# Supplementary material for: Autophagy lipidation machinery regulates axonal microtubule dynamics but is dispensable for survival of mammalian neurons
Source: PubMed Central journal article supplement (PMC7093409; doi:10.1038/s41467-020-15287-9), 2020-03-24
Supplement: 41467_2020_15287_MOESM1_ESM.pdf [file 41467_2020_15287_MOESM1_ESM.pdf]

**Autophagy lipidation machinery regulates axonal microtubule dynamics but is  
dispensable for survival of mammalian neurons**

**Negrete-Hurtado et al.**

**Supplementary Table 1. List of antibodies used in the current study**

| REAGENT or RESOURCE                               | SOURCE |        |        | IDENTIFIER          |                   |
|---------------------------------------------------|--------|--------|--------|---------------------|-------------------|
| Antibodies                                        |        |        |        |                     |                   |
|                                                   | WB     | ICC    | IHC    |                     |                   |
| Rabbit polyclonal anti-ATG16L1                    | 1:1000 | -      | -      | MBL                 | Cat# PM040        |
| Rabbit monoclonal anti-ATG5                       | 1:1000 | -      | -      | abcam               | Cat# ab108327     |
| Rabbit polyclonal anti-ATG9                       | -      | 1:300  | -      | Novus Biologicals   | Cat# NB110-56893  |
| Rabbit polyclonal anti-ATG13                      | -      | 1:300  | -      | Arigo (Biomol GmbH) | Cat# ARG55112.050 |
| Guinea pig polyclonal anti-Bassoon                |        | 1:500  | 1:500  | Synaptic Systems    | Cat# 141 004      |
| Rabbit polyclonal anti-CASPASE-3 cleaved (Asp175) | 1:1000 | -      | 1:200  | Cell Signaling      | Cat# 9661         |
| Rabbit polyclonal anti-c-FOS                      | -      | -      | 1:500  | Synaptic Systems    | Cat# 226 003      |
| Rabbit polyclonal anti-CLASP2                     | 1:1000 | 1:500  | 1:500  | Millipore           | Cat# ABT263       |
| Goat polyclonal anti-DNCT1                        | -      | 1:200  | -      | abcam               | Cat# ab11806      |
| Rabbit polyclonal anti-ELKS1                      | 1:1000 | 1:500  | -      | Novus Biologicals   | Cat# NBP1-88178   |
| Rabbit monoclonal anti-FIP200                     | 1:1000 | 1:200  | -      | Cell Signaling      | Cat# 12436        |
| Mouse monoclonal anti-GAPDH                       | 1:1000 | -      | -      | Sigma-Aldrich       | Cat# G8795        |
| Chicken polyclonal anti-GFP                       | -      | 1:2000 | 1:1000 | abcam               | Cat# ab13970      |
| Mouse monoclonal anti-GFP                         | 1:5000 | -      | -      | Takara Bio Clontech | Cat# 632375       |
| Rabbit polyclonal anti-LC3B                       | 1:2000 | -      | -      | Novus Biologicals   | Cat# NB600-1384SS |
| Mouse monoclonal anti-LC3A/B                      | -      | 1:300  | -      | MBL                 | Cat# M152-3       |
| Mouse monoclonal anti-MAP2                        | -      | 1:500  | -      | Sigma-Aldrich       | Cat# M9942        |
| Mouse monoclonal anti-MAPK activated (P-ERK-1&2)  | 1:1000 | -      | -      | Sigma-Aldrich       | Cat# M8159        |

|                                                              |        |        |        |                        |                  |
|--------------------------------------------------------------|--------|--------|--------|------------------------|------------------|
| Rabbit polyclonal anti-mCherry                               | 1:2000 | -      | -      | abcam                  | Cat# ab167453    |
| Mouse monoclonal anti-mCherry                                | -      | 1:5000 | -      | Novus Biologicals      | Cat# NBP1-96752  |
| Rabbit polyclonal anti-P-S6 Ribosomal Protein (Ser235/236)   | 1:1000 | -      | -      | Cell Signaling         | Cat# 2211        |
| Guinea pig polyclonal anti-p62                               | 1:1000 | 1:500  | 1:1000 | Progen                 | Cat# GP62-C      |
| Rabbit monoclonal anti-P-AKT (Ser473)                        | 1:1000 | -      | -      | Cell Signaling         | Cat# 4060        |
| Rabbit monoclonal anti-RAB7                                  | -      | 1:250  | -      | Cell Signaling         | Cat#9367S        |
| Rabbit polyclonal anti-SYB2                                  | -      | 1:800  | -      | Synaptic Systems       | Cat# 104 202     |
| Mouse monoclonal anti-Synapsin 1                             | -      | 1:500  | -      | Synaptic Systems       | Cat# 106 001     |
| Rabbit polyclonal anti-P-TRKB (Y816)                         | 1:1000 | 1:250  | -      | abcam                  | Cat# ab75173     |
| Mouse monoclonal anti- $\alpha$ -Tubulin                     | 1:1000 | 1:500  | -      | Synaptic Systems       | Cat# 302 211     |
| Mouse monoclonal anti- beta-3-Tubulin                        | -      | -      | 1:500  | Thermo Fisher Sci      | Cat# 14-4510-80  |
| Rabbit monoclonal anti- $\alpha$ -Tubulin acetylated (Lys40) | 1:1000 | -      | -      | Cell Signaling         | Cat# 5335        |
| Mouse monoclonal anti- $\alpha$ -Tubulin tyrosinated         | 1:1000 | -      | -      | Sigma-Aldrich          | Cat# T9028       |
| Rabbit polyclonal anti- $\alpha$ -Tubulin detyrosinated      | 1:1000 | -      | -      | Millipore              | Cat# AB3201      |
| Rabbit polyclonal anti- $\alpha$ -Tubulin $\Delta$ 2         | 1:1000 | 1:500  | -      | Synaptic Systems       | Cat# 302 213     |
| Rabbit antiserum anti-Ubiquitin                              | 1:1000 | 1:200  | -      | Sigma-Aldrich          | Cat# U5379       |
| Mouse monoclonal anti-WIP1                                   | -      | 1:300  | -      | BioRad                 | Cat# AB_10845951 |
| Goat anti-Mouse IgG (H+L) peroxidase-conjugated              | 1:5000 | -      | -      | Jackson ImmunoResearch | Cat# 115-035-003 |

|                                                                  |        |        |       |                        |                  |
|------------------------------------------------------------------|--------|--------|-------|------------------------|------------------|
| Goat anti-Mouse IgG, light chain specific, peroxidase conjugated | 1:5000 | -      | -     | Jackson ImmunoResearch | Cat# 115-035-174 |
| Goat anti-Rabbit IgG (H+L) peroxidase-conjugated                 | 1:5000 | -      | -     | Jackson ImmunoResearch | Cat# 111-035-003 |
| Goat anti-Guinea Pig IgG (H+L) peroxidase-conjugated             | 1:5000 | -      | -     | Jackson ImmunoResearch | Cat# 106-035-003 |
| Normal Rabbit IgG                                                | 1:5000 | -      | -     | Cell Signaling         | Cat# 2729        |
| Normal Mouse IgG                                                 | 1:5000 | -      | -     | Millipore              | Cat# 12-371      |
| Alexa Fluor 488 Goat anti-Mouse IgG                              | -      | 1:500  | -     | Thermo Fisher Sci      | Cat# A-11029     |
| Alexa Fluor 488 Goat anti-Rabbit IgG                             | -      | 1:500  | 1:500 | Thermo Fisher Sci      | Cat# A-11034     |
| Alexa Fluor 488 Goat anti-Chicken IgG                            | -      | 1:500  | 1:500 | Thermo Fisher Sci      | Cat# A-11039     |
| Alexa Fluor 568 Goat anti-Mouse IgG                              | -      | 1:500  | 1:500 | Thermo Fisher Sci      | Cat# A-11031     |
| Alexa Fluor 568 Goat anti-Rabbit IgG                             | -      | 1:500  | 1:500 | Thermo Fisher Sci      | Cat# A-11036     |
| Alexa Fluor 568 Donkey anti-Goat IgG                             | -      | 1:500  | 1:500 | Thermo Fisher Sci      | Cat# A-11057     |
| Alexa Fluor 647 Goat anti-Mouse IgG                              | -      | 1:500  | 1:500 | Thermo Fisher Sci      | Cat# A-21236     |
| Alexa Fluor 647 Goat anti-Rabbit IgG                             | -      | 1:500  | 1:500 | Thermo Fisher Sci      | Cat# A-21245     |
| Alexa Fluor 647 Goat anti-Guinea Pig IgG                         | -      | 1:500  | 1:500 | Thermo Fisher Sci      | Cat# A-21450     |
| Alexa Fluor 647 Goat anti-Rat IgG                                | -      | 1:500  | -     | Thermo Fisher Sci      | Cat# A-21247     |
| Abberior STAR 635P Goat anti-mouse IgG                           | -      | 1:1000 | -     | Abberior               | Cat#ST635P       |

**Supplementary Table 2. List of oligonucleotides, vectors and primers used in the current study**

|                                                        |                                                                          |                  |
|--------------------------------------------------------|--------------------------------------------------------------------------|------------------|
| AAV9- <i>CamKIIα</i> -eGFP                             | Penn Vector Core.<br>University of<br>Pennsylvania School<br>of Medicine | AV-9-pV1917      |
| Oligonucleotides                                       |                                                                          |                  |
| siRNA <i>Clasp2</i> smart pool                         | Dharmacon                                                                | L-062336-01-0005 |
| siRNA <i>Erc1 (Elks1)</i> smart pool                   | Dharmacon                                                                | L-058829-01-0005 |
| siRNA <i>Maplc3b</i> smart pool                        | Dharmacon                                                                | M-040989-01-0005 |
| siRNA <i>Mallc3a</i> smart pool                        | Dharmacon                                                                | L-056203-01-0005 |
| siRNA <i>Fip200</i> smart pool                         | Dharmacon                                                                | L-041191-01-0005 |
| siRNA Scramble non-targeting smart pool                | Dharmacon                                                                | D-001206-13-05   |
| Primer: <i>Bdnf</i> Forward:<br>GGGTCACAGCGGCAGATAAA   | This paper                                                               | N/A              |
| Primer: <i>Bdnf</i> Reverse:<br>GCCTTTGGATACCGGGACTT   | This paper                                                               | N/A              |
| Primer: <i>Ntrk2</i> Forward:<br>CCGCTAGGATTTGGTGTACTG | PrimerBank                                                               | ID: 6679150a1    |
| Primer: <i>Ntrk2</i> Reverse:<br>CCGGGTCAACGCTGTTAGG   | PrimerBank                                                               | ID: 6679150a1    |
| Primer: <i>Gapdh</i> Forward:<br>AACTTTGGCATTGTGGAAGG  | <sup>1</sup>                                                             | N/A              |
| Primer: <i>Gapdh</i> Reverse:<br>ACACATTGGGGGTAGGAACA  | <sup>1</sup>                                                             | N/A              |
| Cre-Primer for genotyping:                             |                                                                          |                  |
| Gen.Cre_1: GAACCTGATGGACATGTTTCAGG                     | eurofins                                                                 | N/A              |
| Gen.Cre_2:<br>AGTGCGTTCGAACGCTAGAGCCTGT                | eurofins                                                                 | N/A              |
| Gen.Cre_3: TTACGTCCATCGTGGACA                          | eurofins                                                                 | N/A              |
| Gen.Cre_4: GGCTGGGTGTTAGCC                             | eurofins                                                                 | N/A              |
| <i>Atg5</i> -Primer for genotyping:                    |                                                                          |                  |
| <i>Atg5_1</i> : AATATGAAGGCACACCCCTGAAATG              | eurofins                                                                 | N/A              |
| <i>Atg5_2</i> : ACAACGTCGAGCACGCTGCGCAAGG              | eurofins                                                                 | N/A              |
| <i>Atg5_3</i> : GTECTGCATAATGGTTTAACTCTTGC             | eurofins                                                                 | N/A              |
| <i>Atg16L1</i> -Primer for genotyping:                 |                                                                          |                  |
| <i>Atg16L1_1</i> :CAGAATAATTTCCGGCAGAGACCGG            | eurofins                                                                 | N/A              |

|                                                                                          |                                 |        |
|------------------------------------------------------------------------------------------|---------------------------------|--------|
| <i>Atg16L1_2</i> :AGCCAAAGAAGGAAGGTAAGCA<br>ACGAA                                        | eurofins                        | N/A    |
| Oligonucleotides and primers for mutagenesis and cloning                                 |                                 |        |
| Oligo: <i>Lc3b G120A</i> Forward (mutagenesis):<br>CCCAGGAGACGTTTCGCGACAGCACTGGCTT       | This paper                      | N/A    |
| Oligo: <i>Lc3b G120A</i> Reverse (mutagenesis):<br>ACAGCCAGTGCTGTCGCGAACGTCTCCTGG        | This paper                      | N/A    |
| Oligo: <i>Lc3b G120A</i> -stop Forward (mutagenesis):<br>AGGAGACGTTTCGCGTAAGCACTGGCTGTTC | This paper                      | N/A    |
| Oligo: <i>Lc3b G120A</i> -stop Reverse (mutagenesis):<br>GTAACAGCCAGTGCTTACGCGAACGTCTCT  | This paper                      | N/A    |
| Primer: <i>Lc3a</i> in pEGFP2 Forward (cloning):<br>CGGAATTCATGCCCTCAGACCGGCC            | This paper                      | N/A    |
| Primer: <i>Lc3a</i> in pEGFP2 Reverse (cloning):<br>GCGGATCCTCAGAAGCCGAAGGTTTC           | This paper                      | N/A    |
| Oligo: <i>Lc3a G120A</i> Forward (mutagenesis):<br>CCCAGGAAACCTTCGCCTTCTGAGGATCCC        | This paper                      | N/A    |
| Oligo: <i>Lc3a G120A</i> Reverse (mutagenesis):<br>GTGGATCCTCAGAAGGCGAAGGTTTCCTGG        | This paper                      | N/A    |
| Primer: <i>Gabarap</i> in pEGFP2 Forward (cloning):<br>CAAGAAGCTTCATGAAGTTCGTGTACAAA     | This paper                      | N/A    |
| Primer: <i>Gabarap</i> in pEGFP2 Reverse (cloning):<br>CTGTGGATCCTCACAGACCATAGACGCTTC    | This paper                      | N/A    |
| Oligo: <i>Gabarap G116A</i> Forward (mutagenesis):<br>TGAAAGCGTCTATGCTCTGTGAGGATCCAC     | This paper                      | N/A    |
| Oligo: <i>Gabarap G116A</i> Reverse (mutagenesis):<br>GGTGGATCCTCACAGAGCATAGACGCTTTA     | This paper                      | N/A    |
| Recombinant DNA                                                                          |                                 |        |
| Plasmid: pFUGW-H1-eGFP                                                                   | <sup>2</sup>                    | N/A    |
| Plasmid: pmCherry-N1                                                                     | Kind gift from Dr.<br>M. Kreutz | N/A    |
| Plasmid: ptagRFP-C                                                                       | Kind gift from Dr.<br>M. Kreutz | N/A    |
| Plasmid: pmStrawberry-ATG4BC74A (mouse)                                                  | Addgene                         | #21076 |
| Plasmid: TRKB-mRFP (mouse)                                                               | <sup>3</sup>                    | N/A    |
| Plasmid: EB3-tdTomato (human)                                                            | Addgene                         | #50708 |

|                                       |                                                         |        |
|---------------------------------------|---------------------------------------------------------|--------|
| Plasmid: Tubulin-eGFP (chicken)       | Addgene                                                 | #66105 |
| Plasmid: pEGFP-C1-mApp5 (mouse)       | Kind gift from Prof.<br>M. Lammers                      | N/A    |
| Plasmid: Mito-mCherry                 | Kind gift from Prof.<br>E. Rugarli                      | N/A    |
| Plasmid: ptagRFP-LC3B (pro LC3) (rat) | This paper                                              | N/A    |
| Plasmid: ptagRFP-LC3BG120A (rat)      | This paper                                              | N/A    |
| Plasmid: eGFP-LC3B (rat)              | Kind gift from Dr.<br>M. Kreutz                         | N/A    |
| Plasmid: eGFP-C-LC3BG120A (rat)       | This paper                                              | N/A    |
| Plasmid: eGFP-LC3A (human)            | This paper                                              | N/A    |
| Plasmid: eGFP-LC3AG120A (human)       | This paper                                              | N/A    |
| Plasmid: eGFP-GABARAP (mouse)         | This paper                                              | N/A    |
| Plasmid: eGFP-GABARAP-G116A (mouse)   | This paper                                              | N/A    |
| Plasmid: tdTomato-ELKS1 (rat)         | Kind gift from Dr.<br>H. Kawabe and Prof.<br>Nils Brose | N/A    |
| Plasmid: SYB2-pHluorin (rat)          | 2                                                       | N/A    |

**Supplementary Table 3. Total number of cells in N experiments**

| Main Figures |                                            |    |                    |    |                                                |
|--------------|--------------------------------------------|----|--------------------|----|------------------------------------------------|
| 2e           | WT: 40<br>KO: 40                           | 2h | WT: 234<br>KO: 238 | 2j | Control: 486<br>ATG4B <sup>C74A</sup> :<br>360 |
| 2k           | Scr siRNA: 534<br><i>Fip200</i> siRNA: 820 | 2q | LC3 WT: 332        | 2s | Scr siRNA: 417                                 |

|                       |                                                                                                                    |                  |                                                                                                                            |                             |                                                               |
|-----------------------|--------------------------------------------------------------------------------------------------------------------|------------------|----------------------------------------------------------------------------------------------------------------------------|-----------------------------|---------------------------------------------------------------|
|                       |                                                                                                                    |                  | LC3 G120:<br>251                                                                                                           |                             | <i>Lc3b</i> siRNA:<br>502                                     |
| 3e<br>(ATG5)          | WT: 27<br>KO: 33                                                                                                   | 3e<br>(ATG16L1)  | WT: 31<br>KO: 28                                                                                                           | 3h<br>(ATG5)                | WT: 29<br>KO: 30                                              |
| 3h<br>(ATG16L1)       | WT: 31<br>KO: 22                                                                                                   | 3k               | WT: 27<br>KO: 25                                                                                                           | 3m                          | WT: 28<br>KO: 27                                              |
| 3s and 3r             | 29 per condition                                                                                                   |                  |                                                                                                                            |                             |                                                               |
| 4c                    | WT <sup>eGFP</sup> : 25<br>KO <sup>eGFP</sup> : 26<br>WT <sup>eGFP-ATG5</sup> : 20<br>KO <sup>eGFP-ATG5</sup> : 24 | 4p               | WT: 27<br>KO: 26                                                                                                           | 4r                          | eGFP: 30<br>eGFP-LC3B: 30<br>eGFP-<br>LC3BG120A:<br>30        |
| 4t                    | eGFP: 19<br>eGFP-<br>LC3BG120A: 17<br>eGFP-<br>GABARAPG116A:<br>20                                                 |                  |                                                                                                                            |                             |                                                               |
| 6j                    | KO <sup>Scr</sup> : 247<br>KO <sup>Lc3b siRNA</sup> : 281                                                          | 6k               | WT <sup>Scr</sup> : 27<br>KO <sup>Scr</sup> : 27<br>WT <sup>Elks1 siRNA</sup> :<br>26<br>KO <sup>Elks1 siRNA</sup> :<br>28 | 6m<br>(number<br>spheroids) | KO <sup>Scr</sup> : 142<br>KO <sup>Elks1 siRNA</sup> :<br>125 |
| 6q                    | KO <sup>Scr</sup> : 30<br>KO <sup>Elks1 siRNA</sup> : 26                                                           | 6s               | eGFP: 35<br>eGFP-<br>CLASP2: 39                                                                                            | 6t, 6u, 6v                  | eGFP: 33<br>eGFP-CLASP2:<br>29                                |
| 6h                    | WT: 65<br>KO: 74                                                                                                   |                  |                                                                                                                            |                             |                                                               |
| Supplementary figures |                                                                                                                    |                  |                                                                                                                            |                             |                                                               |
| 2e                    | WT: 40<br>KO: 40                                                                                                   | 2g               | WT: 40<br>KO: 40                                                                                                           | 2m                          | Scr peptide: 42<br>LC3B peptide:<br>46                        |
| 3d                    | WT: 30<br>KO: 30                                                                                                   | 3i, 3m, 3o       | WT: 30<br>KO: 30                                                                                                           | 3k                          | WT: 30<br>KO: 27                                              |
| 3p<br>(boutons)       | WT: 359<br>KO: 358                                                                                                 | 3r<br>(synapses) | WT: 60<br>KO: 60                                                                                                           | 3t                          | WT: 13<br>KO: 13                                              |
| 3u                    | WT: 20<br>KO: 20                                                                                                   | 3w               | WT: 31<br>KO: 28                                                                                                           | 3y (%<br>moving)            | DMSO: 16<br>Ciliobrevin D:<br>15                              |



|                    |                                                                                                              |            |                                                          |     |                             |
|--------------------|--------------------------------------------------------------------------------------------------------------|------------|----------------------------------------------------------|-----|-----------------------------|
| 3z<br>(retrograde) | DMSO: 15<br>Cilobrevin D: 9                                                                                  | 3z         | DIV6: 24<br>DIV12: 20                                    | 3b' | WT: 33<br>KO: 28            |
|                    |                                                                                                              |            |                                                          |     |                             |
| 6p                 | WT <sup>Scr</sup> : 19<br>KO <sup>Scr</sup> : 19<br>WT <sup>Elks1</sup> KD: 16<br>KO <sup>Elks1</sup> KD: 17 | 6r         | KO <sup>Scr</sup> : 37<br>KO <sup>Lc3a</sup> KD: 33      | 6v  | Scr: 25<br>CLASP2 KD:<br>25 |
|                    |                                                                                                              |            |                                                          |     |                             |
| 7a                 | WT+BDNF: 40<br>KO+BDNF: 40                                                                                   | 7b, 7b, 7d | WT+H2O: 32<br>KO+H2O: 36<br>WT+BDNF:33<br>KO+BDNF:<br>35 |     |                             |

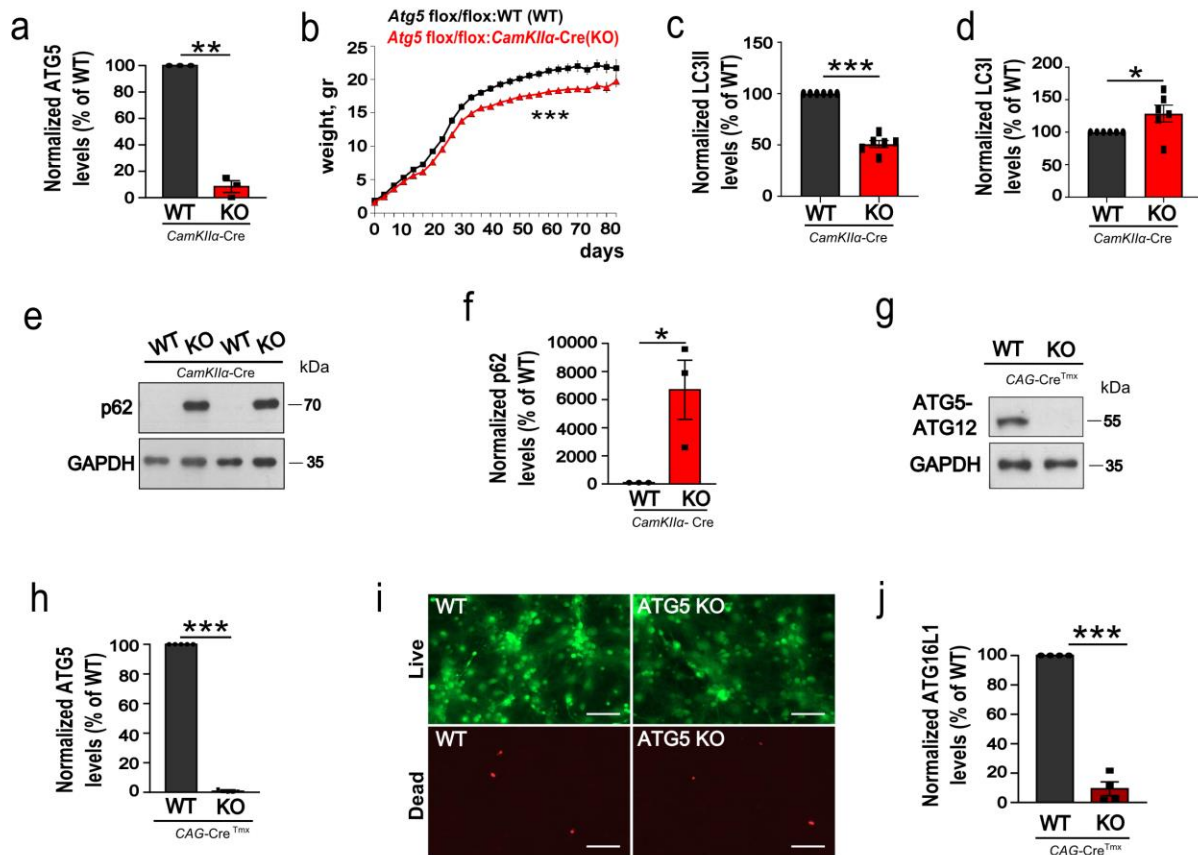

**Supplementary Figure 1. Lack of apoptosis in ATG5 and ATG16L1 KO neurons.** (a) ATG5 expression levels are significantly decreased in cortical brain lysates from 13-week-old ATG5 KO mice compared to controls. Protein levels were quantified relative to GAPDH and the levels in the KO were normalized to the WT set to 100% (KO: 8.40±4.39%). \*\*p=0.001. N=3 independent experiments. (b) Growth curves of WT and ATG5KO mice (KO=22, WT=28 animals). \*\*\*p<0.000. (c) LC3II expression levels are significantly decreased in cortical brain lysates from 13-week-old ATG5 KO mice compared to controls. Protein levels were quantified relative to  $\alpha$ -Tubulin and the levels in the KO were normalized to the WT set to 100% (KO: 50.87±3.45%). \*\*\*p=0.000. N=6 independent experiments. (d) LC3I expression levels are significantly increased in cortical brain lysates from 13-week-old ATG5 KO mice compared to controls. Protein levels

were quantified relative to  $\alpha$ -Tubulin and the levels in the KO were normalized to the WT set to 100% (KO: 128.59 $\pm$ 13.00%). \*p=0.040. N=6 independent experiments. (e,f) p62 expression levels are significantly increased in cortical brain lysates from 13 week-old ATG5 KO mice compared to controls. Protein levels were quantified relative to GAPDH and the levels in the KO were normalized to the WT set to 100% (KO: 6696.69 $\pm$ 2105.47%). \*p=0.044. N=3 independent experiments. (g,h) ATG5 expression levels are significantly decreased in lysates from cultured ATG5 KO neurons. Protein levels in the KO were quantified relative to GAPDH and the levels in the KO were normalized to the WT set to 100% (KO: 1 $\pm$ 0.00%). \*\*\*p <0.000. N=5 independent experiments. (i) Representative fluorescence images of WT and ATG5 KO primary neurons after performing Live/Dead cell viability assay. Scale bar, 150 $\mu$ m. (j) ATG16L1 expression levels are significantly decreased in lysates from cultured ATG16L1 KO neurons. Protein levels in KO condition were normalized to the WT set to 100% (KO:9.34 $\pm$ 4.69%). \*\*\*p<0.000. N=4 independent experiments.

All graphs show mean  $\pm$  SEM, statistical analysis was performed by one-sample Student's *t*-test in (a,c,d,f,h,j) and unpaired two-tailed Student's *t*-test in (b). n.s.-non-significant. Source data are provided as a Source Data file.

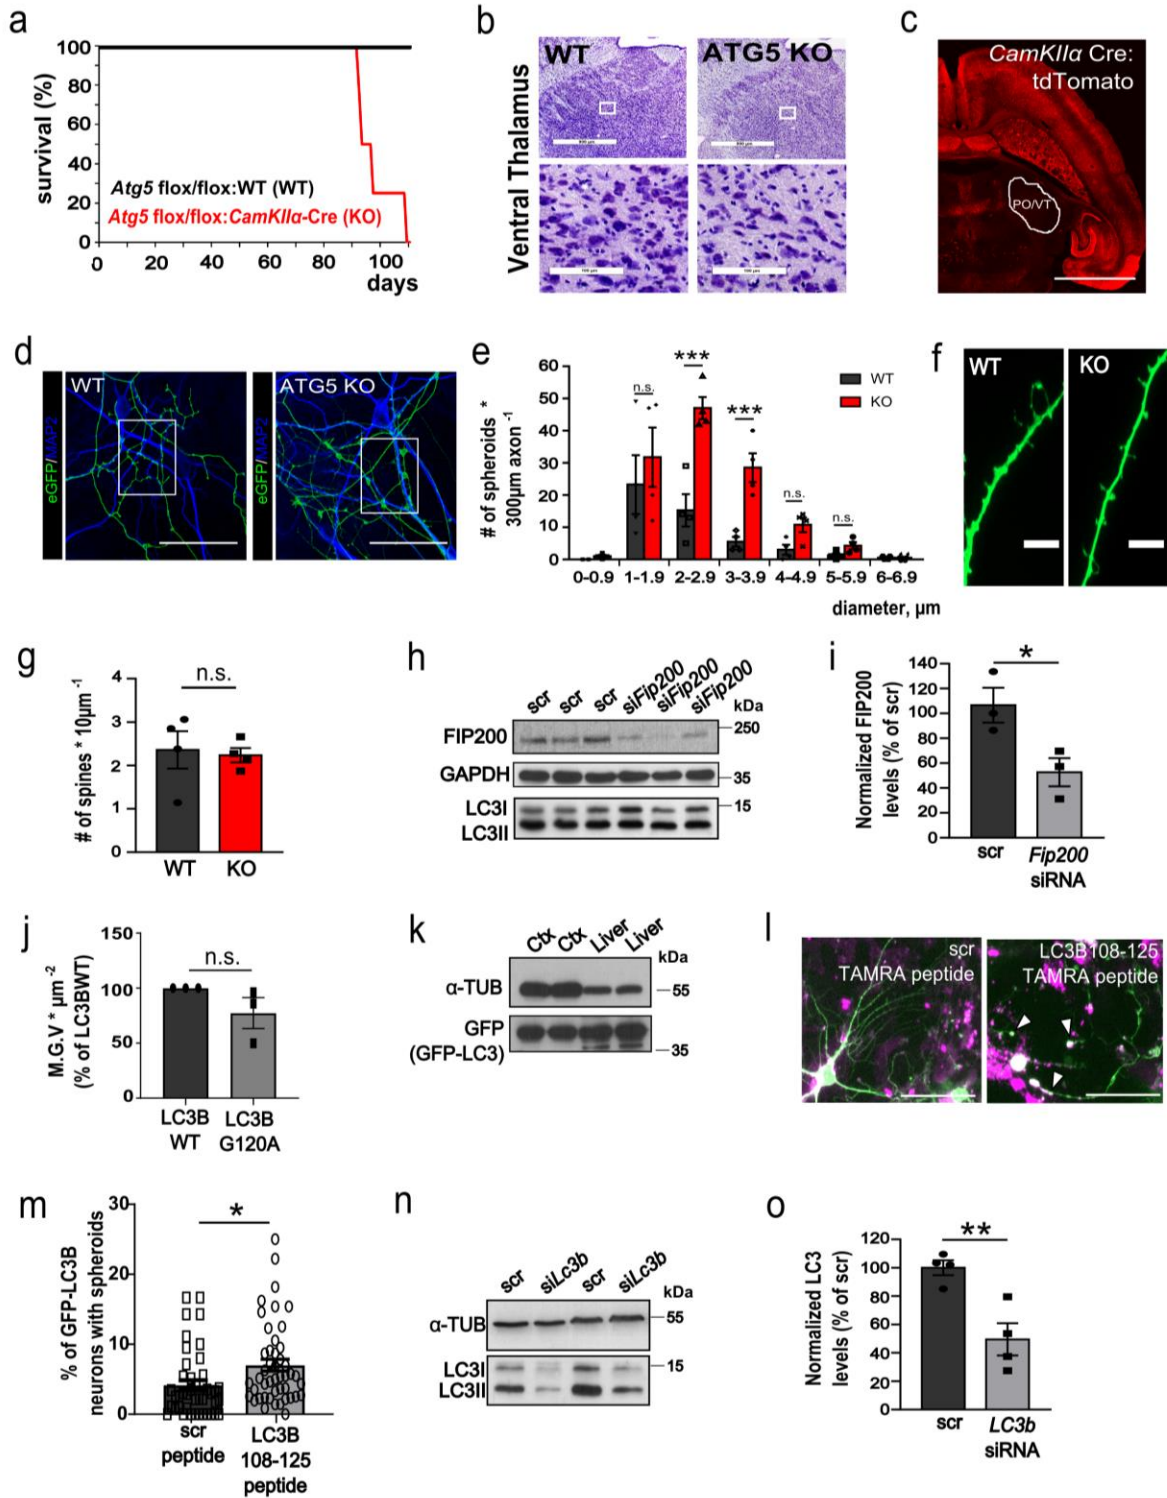

**Supplementary Figure 2. Axonal pathology of ATG5 KO cortical neurons.** (a) Kaplan-Meier survival curves of ATG5 WT and KO mice. (b) Loss of ATG5 in forebrain excitatory neurons causes degeneration of thalamic nuclei. Scale bars: 900  $\mu\text{m}$ , inserts 100  $\mu\text{m}$ . (c) Cre expression in

the brain of *CamkIIα:Cre/Rosa-tdTomato* mice. Scale bar, 1 mm. **(d)** Primary neurons from WT and ATG5KO mice transfected with eGFP and immunostained for MAP2. Rectangular boxes indicate the areas magnified in Fig. 2d. Scale bars, 50 μm. **(e)** Histogram showing the number of axonal swellings in WT and ATG5KO neurons plotted as a function of their diameter. \*\*\* $p_{WT vs KO} < 0.0000$  (for 2-2.99), \*\*\* $p_{WT vs KO} = 0.0009$  (for 3-3.99). N=4 independent experiments. **(f,g)** Spine density in WT and ATG5 KO neurons. N=4 independent experiments. Scale bar, 5 μm. **(h,i)** Expression levels of FIP200 in MEF cells transfected either with scr or *Fip200* siRNA. \* $p = 0.042$ . N=3 independent experiments. **(j)** Expression levels of wild type LC3B and LC3BG120A in cultured neurons.  $p = 0.2489$ . N=3 independent experiments. **(k)** Expression levels of GFP-LC3 in the cortex (Ctx) and the liver from 10 weeks old GFP-LC3 mice. Samples arise from the same experiment and the blots were processed in parallel, such that one loading control was used. **(l)** Representative images of eGFP-LC3B transgenic neurons treated with LC3B 108-125 or scramble (scr) TAMRA peptides. The red channel intensity was overexposed to illustrate the TAMRA signal within the neurons. Scale bar, 50 μm. **(m)** Percentage of eGFP-LC3B neurons with spheroids. \* $p = 0.012$ . 42-46 images per group (containing in total 1971 (Scr) and 2871 (LC3B) neurons) from N=3 independent experiments. Scale bar, 50 μm. **(n,o)** Expression levels of LC3 in MEF cells transfected either with scr ( $100 \pm 4.5\%$ ) or *Lc3b* siRNA ( $49.48 \pm 9.86\%$ ). \*\* $p = 0.007$ . N=4 independent experiments).

All graphs show mean  $\pm$  SEM, statistical analysis was performed by unpaired two-tailed Student's *t*-test in (g,m), and two-way ANOVA for multiple comparisons in (e) and one-sample Student's *t*-test in (i,j,o). In (i,j,o) KO was normalized to the WT set to 100%. n.s.-non-significant. Total number of neurons in N experiments is shown in Supplementary Table 3. Source data are provided as a Source Data file.

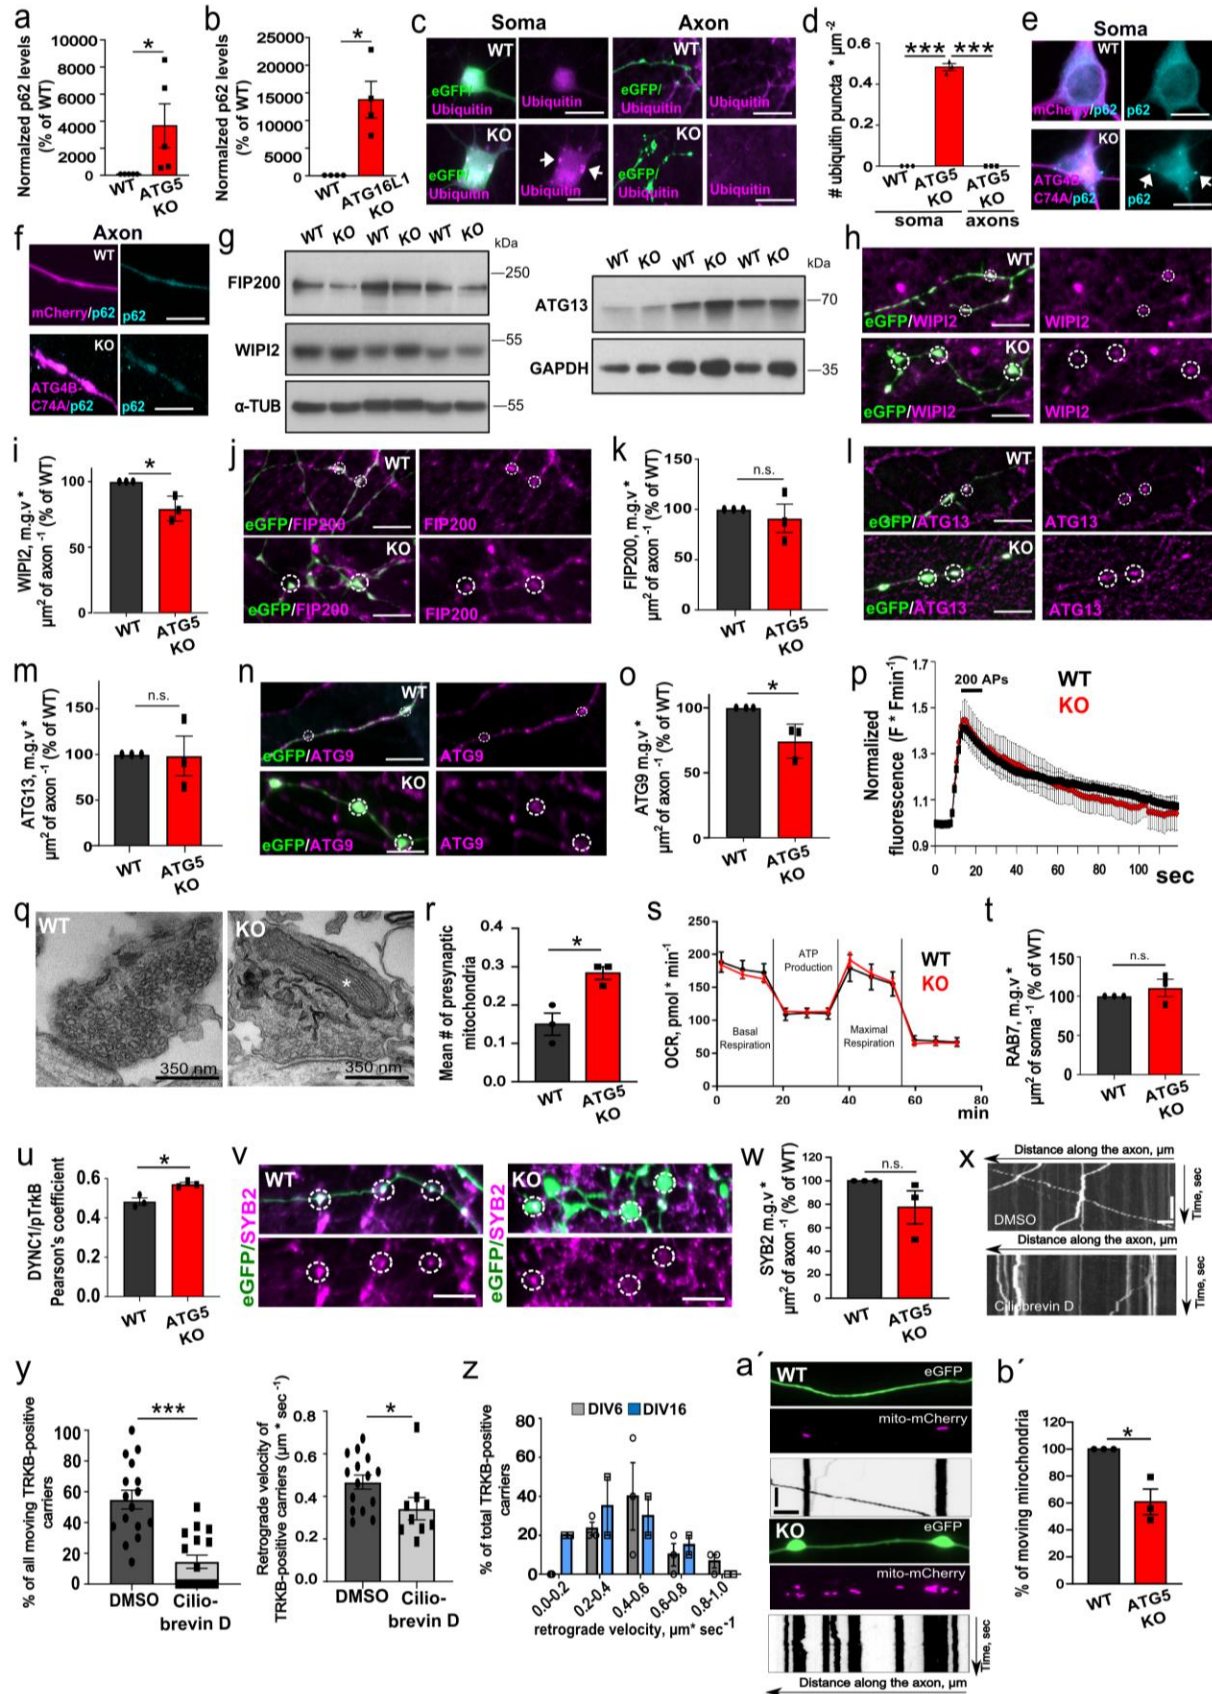

**Supplementary Figure 3. Functional mitochondria accumulate at ATG5 KO synapses. (a,b)** p62 protein levels in WT and ATG5 KO (\*p=0.046, N=5 independent experiments) or ATG16L1 KO (\*p=0.013, N=4 independent experiments) lysates. **(c,d)** Ubiquitin puncta density in ATG5 KO neurons (\*\*\*p WT<sup>soma</sup> vs KO<sup>soma</sup> =0.000; \*\*\*p KO<sup>soma</sup> vs KO<sup>axon</sup> =0.000). **(e,f)** mCherry- or pmStrawberry-ATG4B<sup>C74A</sup>-expressing neurons, immunostained for p62. **(g)** Protein levels of FIP200, WIPI2 and ATG13 in WT and ATG5 KO lysates. **(h-o)** Immunofluorescent levels of WIPI2 (\*p=0.032), FIP200 (p=0.298), ATG13 (p=0.474) and ATG9 (KO: \*p=0.039) in eGFP-expressing WT and ATG5 KO axons. **(p)** SYB2-pHluorin responses to 200 APs at 50 Hz in WT and ATG5 KO neurons. **(q,r)** Number of mitochondria within 500nm of the AZ in WT and ATG5 KO neurons (\*p=0.016). **(s)** Mitochondrial function in cultured WT and ATG5 KO neurons, measured by Seahorse Assay. 4 wells with 20000 cells per group. **(t)** RAB7 levels in WT or ATG5 KO somata (p=0.219). **(u)** Colocalization of DYNC1 and p816TRKB in WT and ATG5 KO axons, measured by Pearson's correlation coefficient (\*p=0.011). **(v,w)** SYB2 levels in WT and ATG5 KO axons (p=0.124). Scale bar, 5µm. **(x)** Time-lapse images of WT axons treated with DMSO or 20µM Ciliobrevin D for 3h. **(y)** Percentage of moving TRKB vesicles (\*\*\*p<0.0001) and their retrograde velocity in neurons, treated either with DMSO or Ciliobrevin D (\*p=0.045). 16 DMSO and 17 CiliobrevinD neurons from N=2 independent experiments. **(z)** Retrograde velocity of TRKB vesicles in DIV6 (24 neurons, N=3, independent experiments) and DIV16 neurons (20 neurons, N=2 independent experiments). **(a',b')** Relative axonal mobility of Mito-mCherry in ATG5 KO neurons is significantly decreased compared to controls (\*p=0.027). Scale bar, 5µm (snapshots).

Data in (d,i,j,k,m,o,p,r,t,u,w,b`) are from N=3 independent experiments. All graphs show mean ± SEM, statistical analysis was performed by unpaired two-tailed Student's *t*-test in (r,u,y)

and one-sample Student's *t*-test in (a,b,d,I,k,m,o,t,w,b'). In (a,b,d,I,k,m,o,t,w,b') KO was normalized to the WT set to 100%. Scale bars in (c,e,f,h,j,l,n) 10µm. Total number of neurons in N experiments is shown in Supplementary Table 3. Source data are provided as a Source Data file. n.s.-non-significant. Kymographs scale bar: 5µm x 20sec.

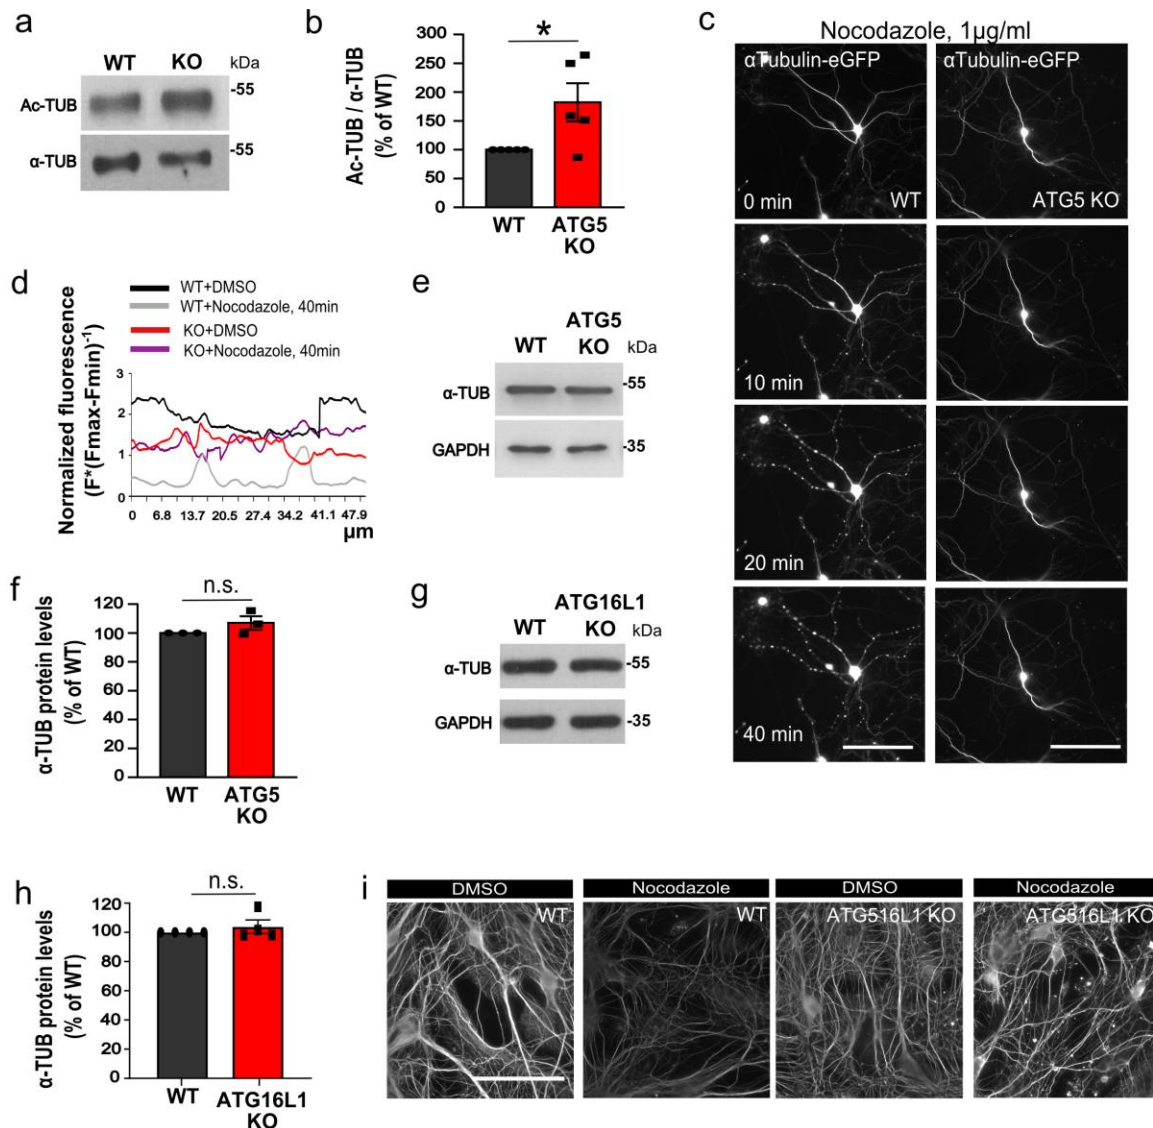

**Supplementary Figure 4. Hyperstability of microtubules in ATG5 and ATG16L1 KO neurons.** (a, b) Levels of acetylated tubulin are significantly increased in lysates from cultured



ATG5 KO neurons compared to controls (KO:  $182.25 \pm 33.07\%$ ). Protein levels in KO condition were normalized to the WT set to 100%. \* $p=0.034$ . N=5 independent experiments. (c) Time-lapse images of WT and ATG5 KO neurons transfected with  $\alpha$ Tubulin-eGFP and treated with  $1\mu\text{g/ml}$  of Nocodazole for 40 min. Scale bars,  $100\mu\text{m}$ . (d) In WT neurons treated with nocodazole a profound loss of  $\alpha$ Tubulin-eGFP immunofluorescence along the neurites is detected. In contrast, ATG5 KO neurons treated with Nocodazole were indistinguishable from DMSO-treated controls. (e,f) Levels of total  $\alpha$ -tubulin are not altered in ATG5 KO neurons compared to controls. Protein levels were normalized to GAPDH and the levels in the KO condition were normalized to the WT set to 100% (KO:  $106.99 \pm 4.69\%$ ).  $p=0.137$ . N=4 independent experiments. (g,h). Levels of  $\alpha$ -tubulin are not altered in ATG16 KO neurons compared to controls. Protein levels were normalized to GAPDH and the levels in the KO condition were normalized to the WT set to 100% (KO:  $103.90 \pm 4.64\%$ ,  $p=0.436$ , N=4 independent experiments). (i) Immunofluorescence images of WT and ATG16L1KO neurons treated with  $0.2\mu\text{g/ml}$  Nocodazole for 1h or with DMSO as a control and immunostained for  $\alpha$ -Tubulin. Scale bar,  $50\mu\text{m}$ .

All graphs show mean  $\pm$  SEM, statistical analysis was performed one-sample Student's  $t$ -test. n.s.-non-significant. Source data are provided as a Source Data file.

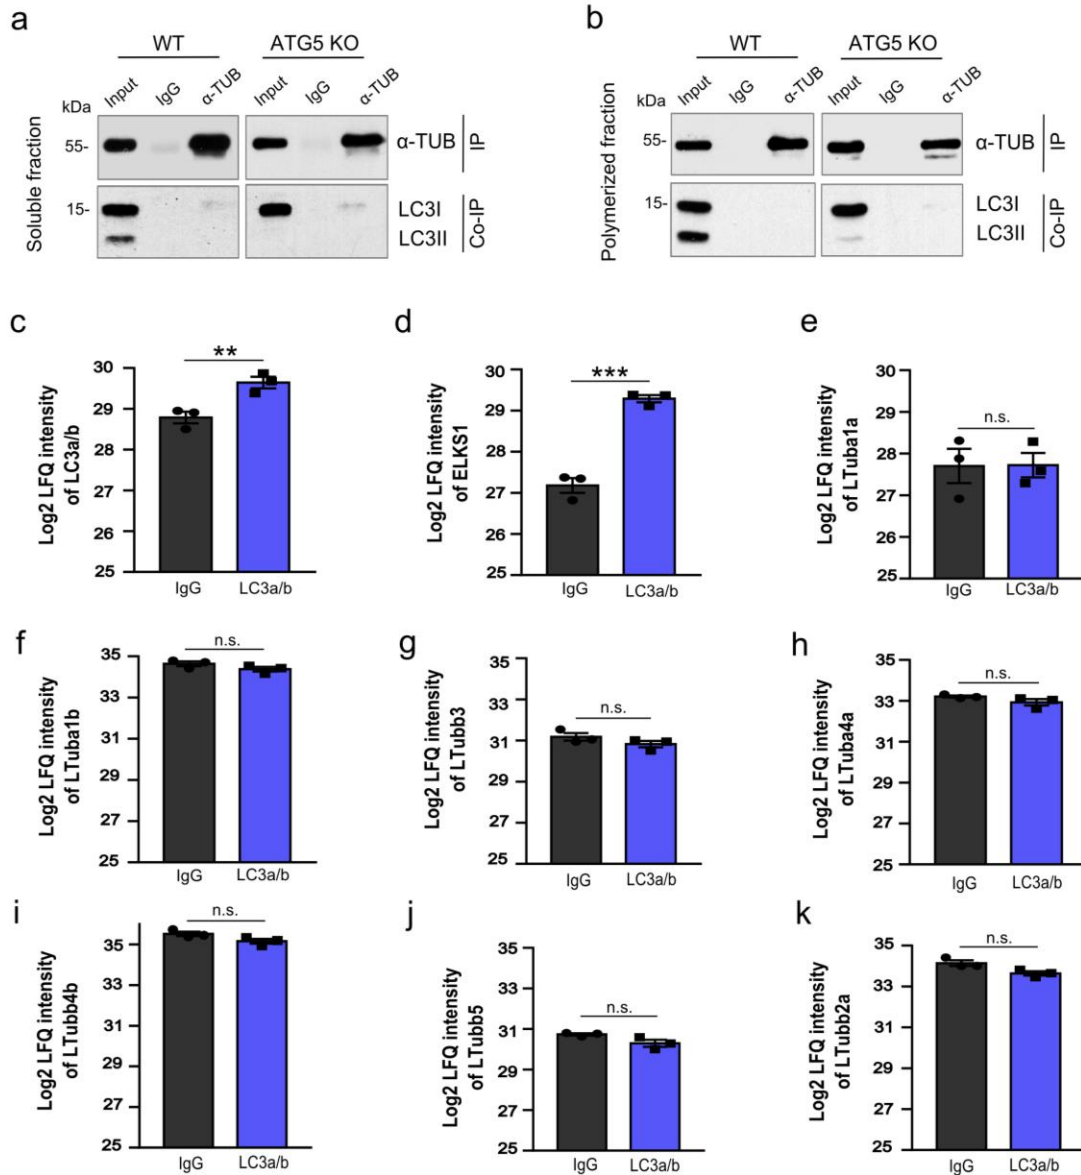

**Supplementary Figure 5. Cytoplasmic LC3a/b associates with ELKS1, but not with tubulin in neurons.** (a) Co-immunoprecipitation of endogenous LC3 with  $\alpha$ -Tubulin in soluble microtubules isolated from cultured WT and ATG5 KO neurons. Input, 5% of lysate was added to the assay. Example from N=3 experiments. (b) Co-immunoprecipitation of endogenous LC3 with  $\alpha$ -Tubulin in polymerized microtubules isolated from cultured WT and ATG5 KO neurons. Input, 8% of lysate was added to the assay. Example from N=3 independent experiments. (c-k) Mass

spectrometry analysis of LC3 interaction partners (LC3a/b) or control IgG antibody (IgG) in the brain (N=3 brains for each condition). Log<sub>2</sub> LFQ (label-free quantification) intensity denote change of expression of the protein (LC3a/b: \*\*p=0.006; ELKS1: \*\*\*p<0.000). N=3 independent experiments.

All graphs show mean  $\pm$  SEM, statistical analysis was performed by unpaired two-tailed Student's *t*-test. n.s.-non-significant. Source data are provided as a Source Data file.

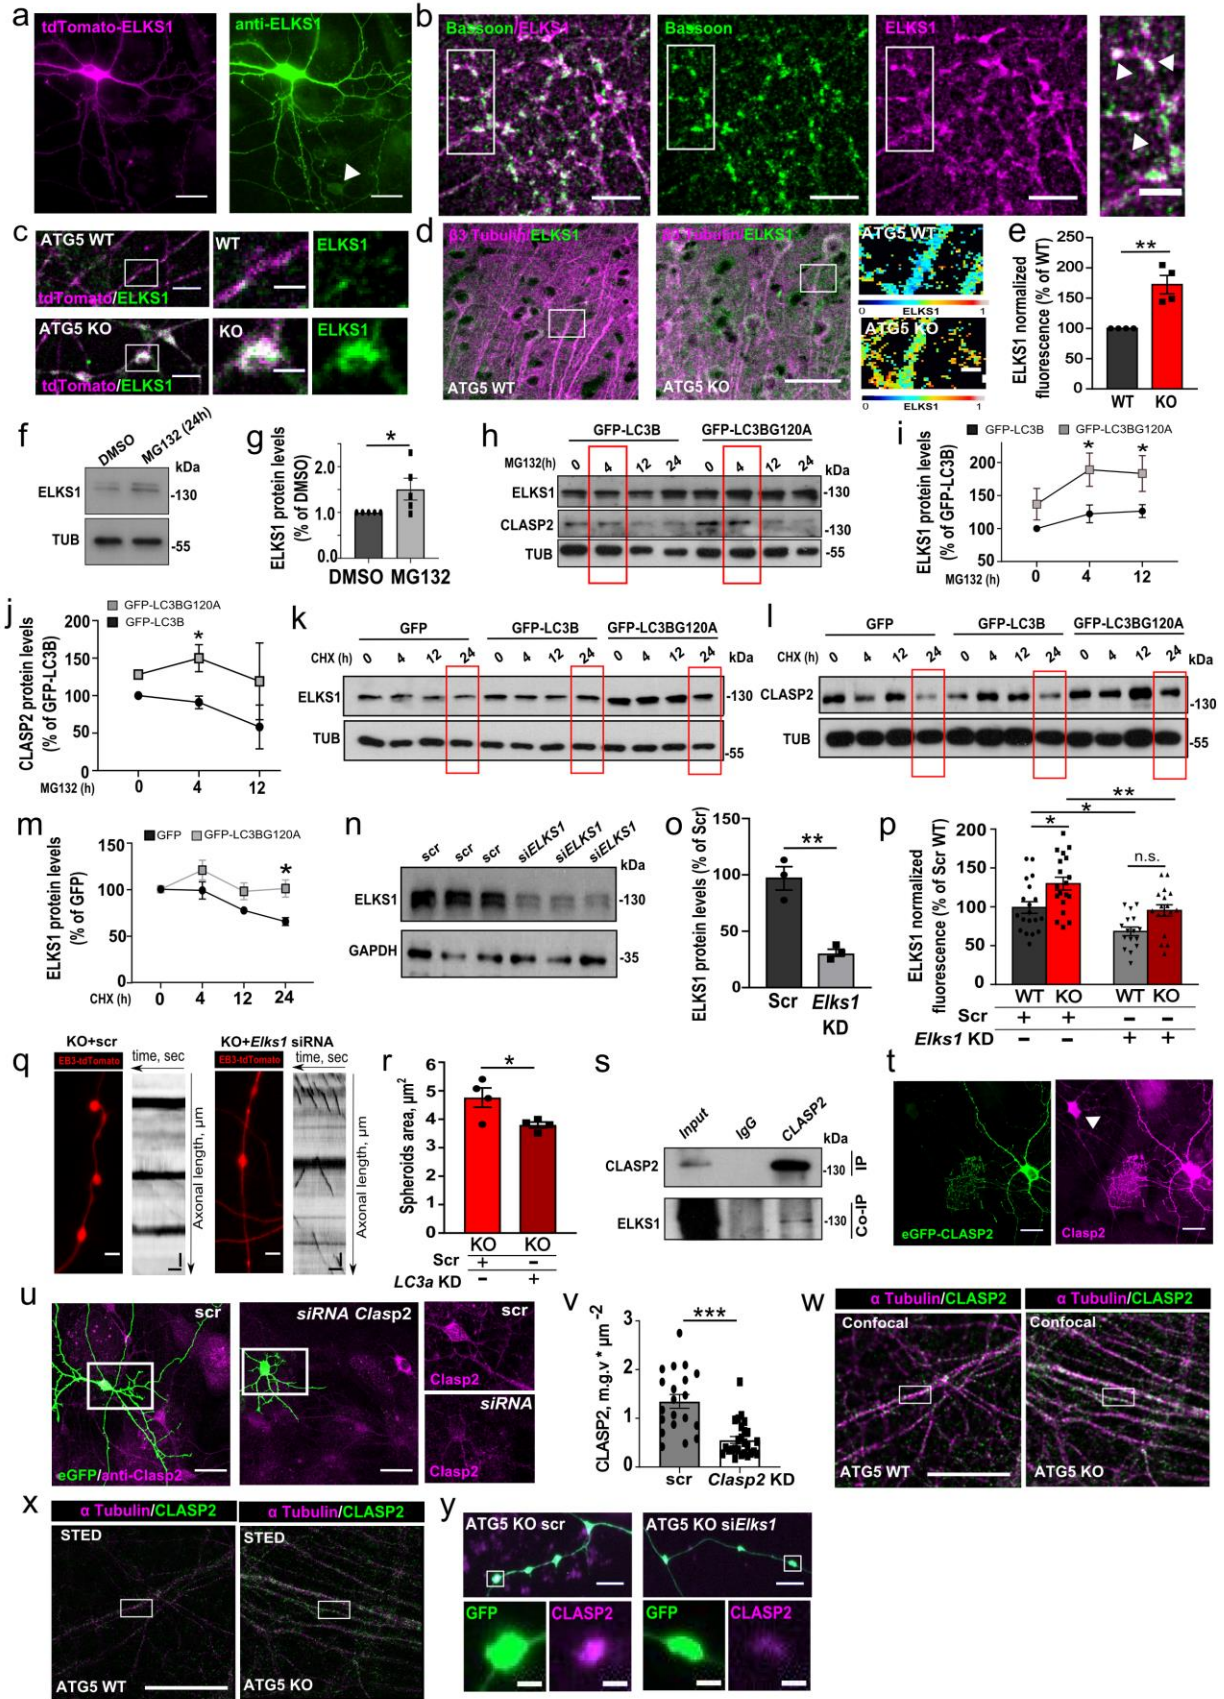

**Supplementary figure 6. Cytoplasmic LC3 prevents ELKS1 proteasomal degradation.** (a) ELKS1 antibody recognizes overexpressed tdTomato-ELKS1. Arrow indicates untransfected neuron. (b) Bassoon and ELKS1 immunostaining in cultured neurons. (c) WT and ATG5 KO neurons, immunostained for ELKS1. (d) WT and ATG5 KO cortices immunostained for ELKS1 and  $\beta$ 3-Tubulin. In the right panel, ELKS1 intensity was false color-coded. (e) ELKS1 levels in WT and ATG5 KO brains (\*\*p=0.009). (f,g) ELKS1 levels in MG132-treated NSC34 cells (\*p=0.049). (h-j) ELKS1 and CLASP2 levels in MG132-treated GFP-LC3B- or GFP-LC3B G120A-expressing HEK239T cells. \*p<sup>ELKS1</sup>(4h)=0.012, \*p<sup>ELKS1</sup>(12h)=0.031, \*p<sup>CLASP2</sup>(4h)=0.016. Samples arise from the same experiment and the blots were processed in parallel, such that one loading control was used. (k-m) ELKS1 and CLASP2 stability in cyclohexamide-treated GFP-, GFP-LC3B- or GFP-LC3BG120A-expressing HEK 293T cells. \*p<sup>eGFP</sup>(0h) vs <sup>eGFP</sup>(24h)=0.013, \*p<sup>eGFP</sup>(24h) vs <sup>eGFP-LC3BG120A</sup>(24h)=0.033. (n,o) ELKS1 levels in NSC34 cells treated with scr or *Elks1* siRNA. \*\*p=0.004. (p) ELKS1 levels in WT or ATG5 KO axons treated with scr (WT<sup>Scr</sup>, KO<sup>Scr</sup>, 19 neurons each) or *Elks1* siRNA (WT<sup>*Elks1* KD</sup>, 16 neurons, KO<sup>*Elks1* KD</sup>, 17 neurons). \*p<sup>WT<sup>Scr</sup></sup> vs KO<sup>Scr</sup>= 0.016, p<sup>WT<sup>Scr</sup></sup> vs \*WT<sup>*Elks1* KD</sup>=0.023, \*\*p KO<sup>Scr</sup> vs KO<sup>*Elks1* KD</sup>= 0.007. (q) EB3-tdTomato-expressing ATG5 KO neurons treated with scr or *Elks1* siRNA. Scale bars, x: 5 $\mu$ m, y: 15sec. (r) Spheroid area in ATG5 KO neurons treated with scr or *Lc3a* siRNA, \*p=0.035. (s) ELKS1 and CLASP2 co-IP in mouse brain. Input, 4% of lysate. (t) CLASP2 antibody recognizes overexpressed eGFP-CLASP2. Arrow indicates untransfected neuron. (u,v) CLASP2 is decreased in *Clasp2* siRNA-treated neurons. \*\*\*p<0.000. 20 for scr and 25 for siRNA neurons. (w, x) Confocal and STED images of neurons. (y) CLASP2 levels in ATG5 KO axons treated with scr or *Elks1* siRNA.

Data in (i,j,m,o,v) come from N=3, in (e,r) from N=4, in (g) from N=5, in (p,v) from N=2 independent experiments. Graphs show mean  $\pm$  SEM, statistical analysis was performed by one-sample Student's *t*-test in (e,g,o,p), two-way ANOVA for multiple comparisons in (i,j,m) and unpaired two-tailed Student's *t*-test in (r,v). Source data are provided as a Source Data file. Scale bars: (a,t) 20 $\mu$ m, (b,y) 5 $\mu$ m, inserts 2 $\mu$ m, (c,w,x) 10 $\mu$ m, inserts 4 $\mu$ m, (d) 100 $\mu$ m, (u) 50 $\mu$ m.

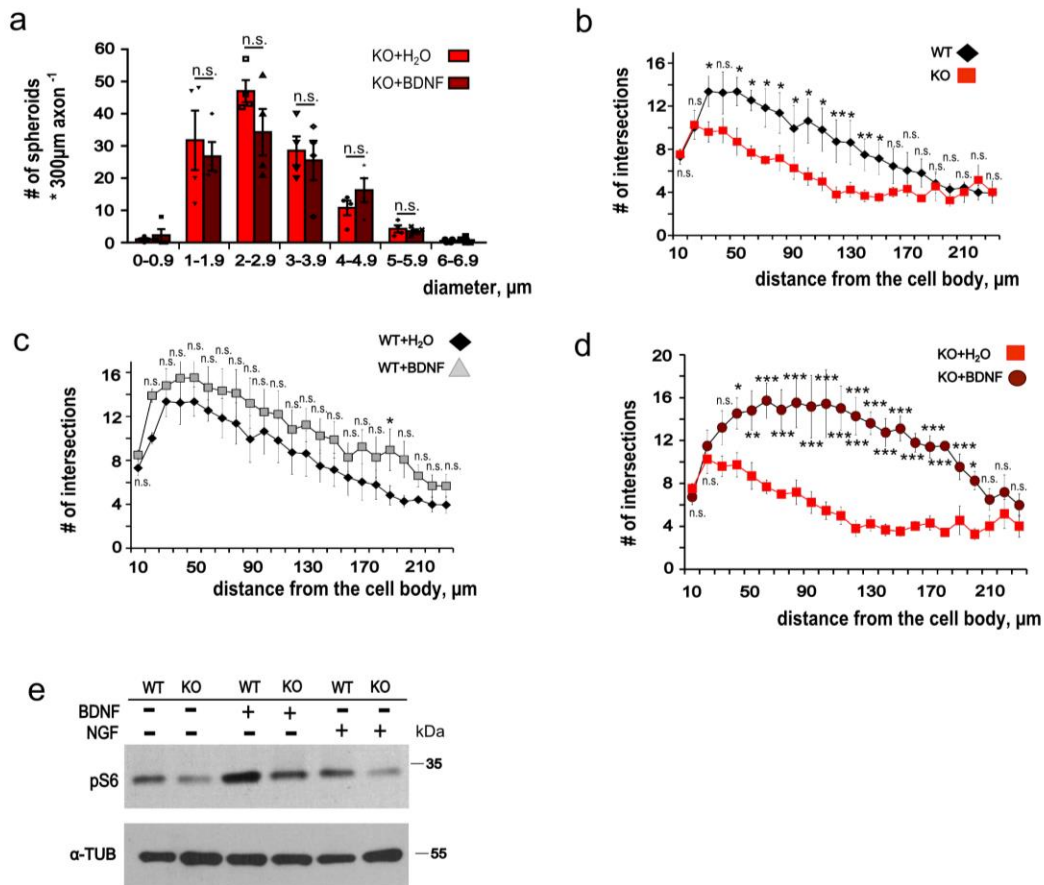

**Supplementary figure 7. BDNF rescues defective branching complexity in autophagy-deficient neurons.** (a) Unaltered number of axonal swellings in ATG5 KO neurons treated with 50ng/ml of BDNF compared to H<sub>2</sub>O-treated KO controls. N=4 independent experiments. (b-d) Sholl analysis of cultured WT and ATG5 KO neurons at DIV18 reveals the decrease in neuronal

complexity upon loss of ATG5 (b), a phenotype rescued via long-term application of 50 ng/ml of BDNF (c,d). N=4 independent experiments. \* indicates  $p \leq 0.05$ , \*\* indicates  $p \leq 0.01$ , \*\*\* indicates  $p \leq 0.001$ . (e) Immunoblot illustrating the long-term effect of either BDNF (50ng/ml) or NGF (50ng/ml) treatment on the levels of phosphorylated S6 Ribosomal Protein (pS6) in cultured WT and ATG5 KO neurons.

All data shown represent the mean  $\pm$  SEM. Statistical significance for all data was tested by two-way ANOVA repeated measures for multiple comparisons. Total number of neurons in N experiments is shown in Supplementary Table 3. Source data are provided as a Source Data file. n.s.-non-significant.

Figure 1a

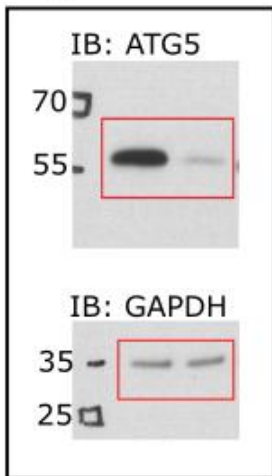

Figure 1b

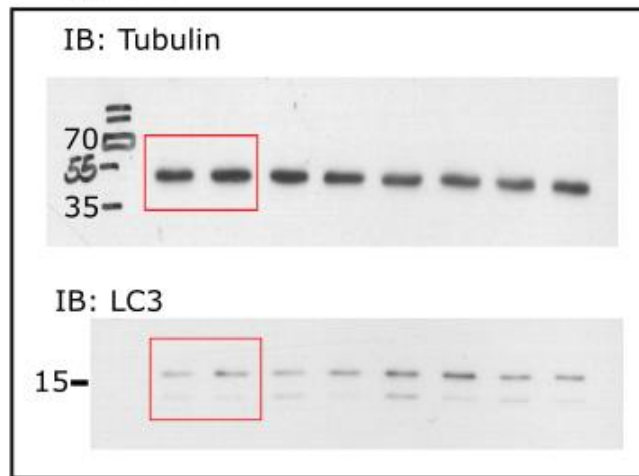

Figure 1h

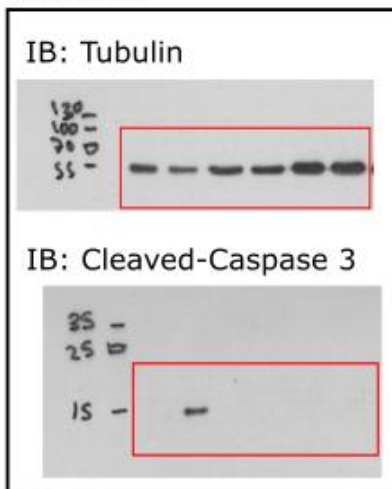

Figure 1k

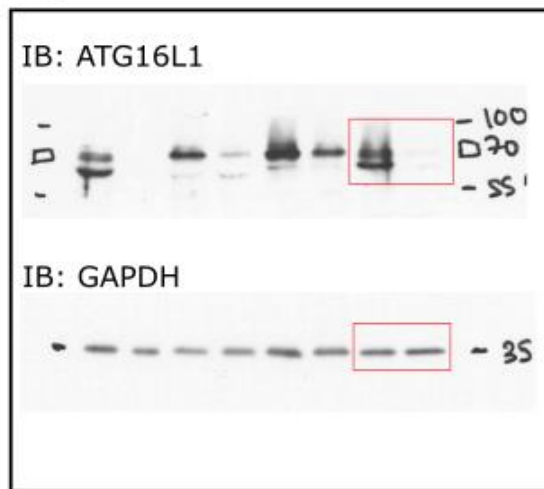

Figure 1l

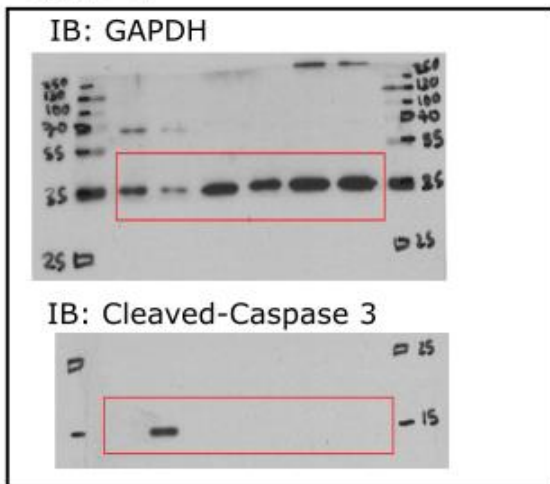

immunoblots from Figure 1



Figure 2l

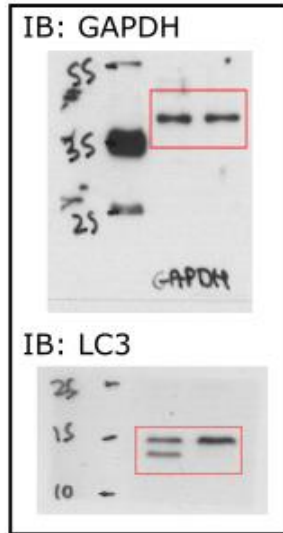

Figure 2n

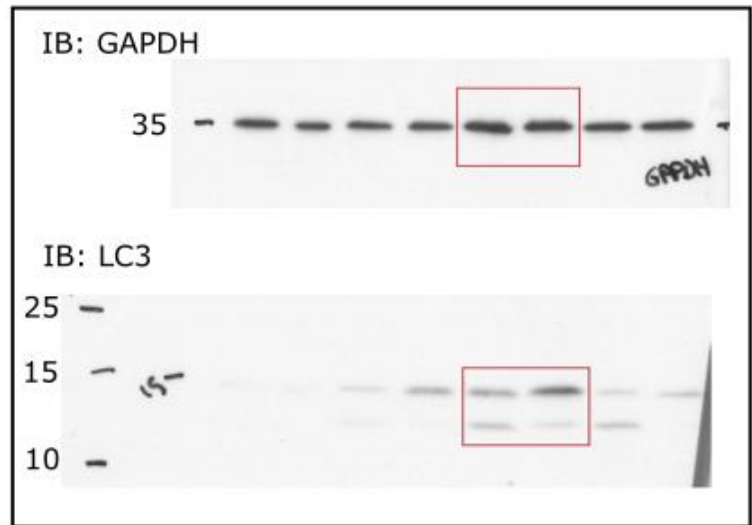

Figure 3a

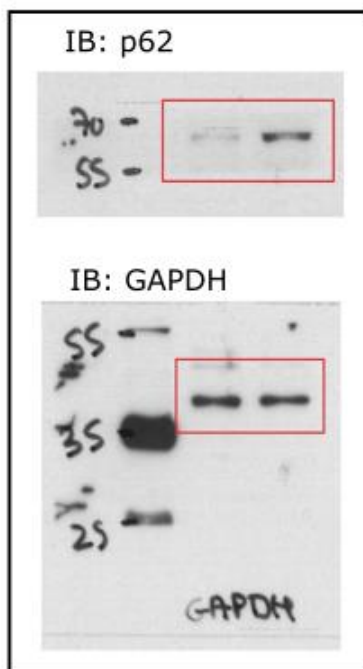

Figure 3b

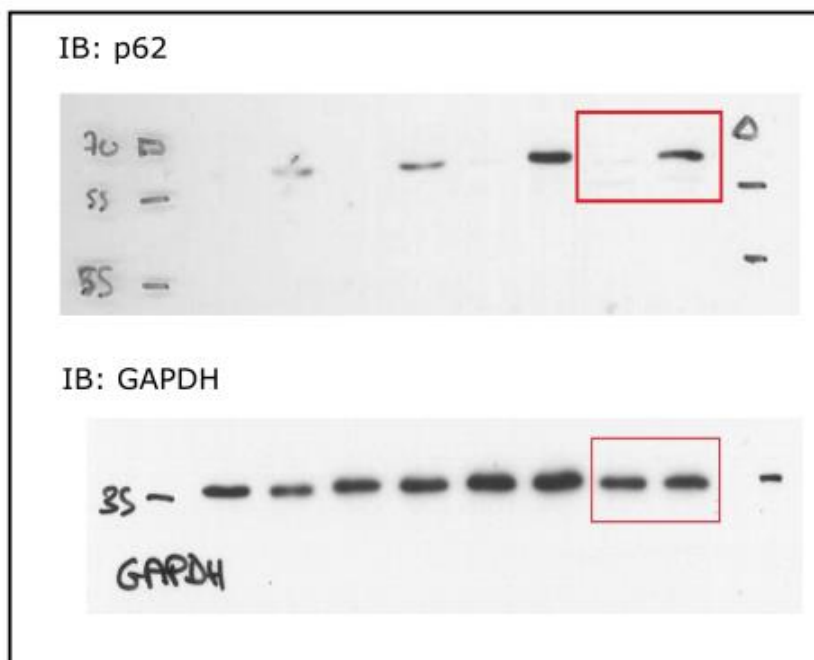

Figure 4d

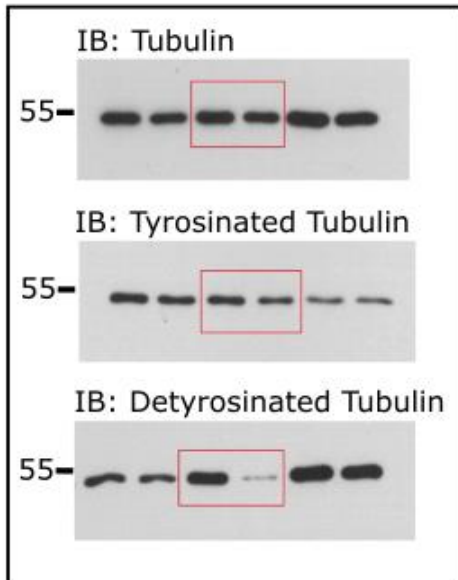

Figure 4g

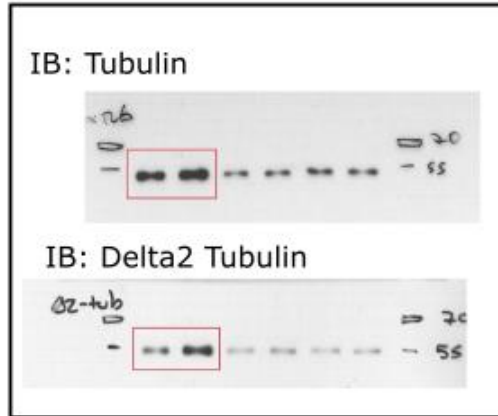

Figure 4i

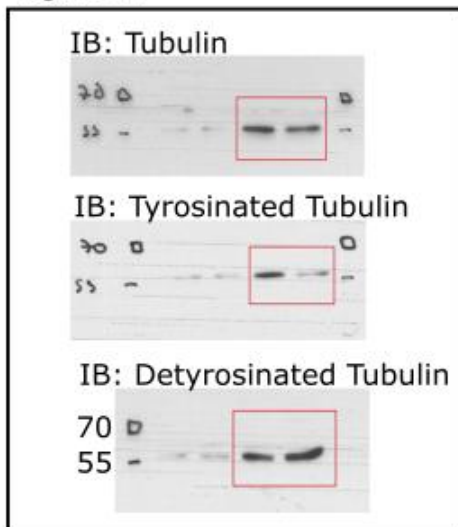

Figure 4l

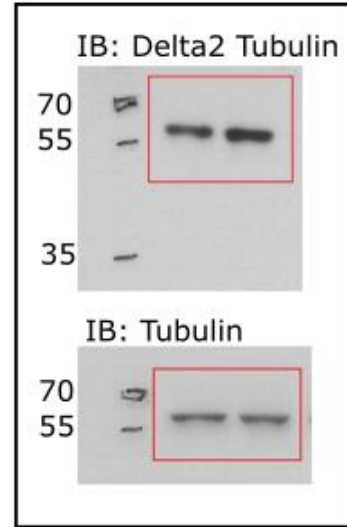

Figure 5b

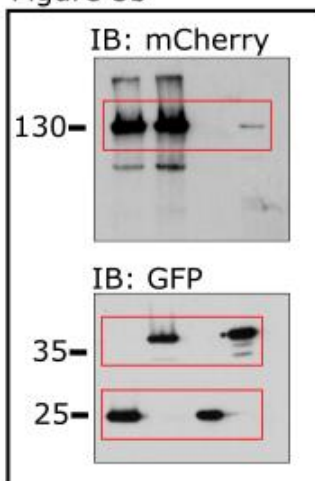

Figure 5c

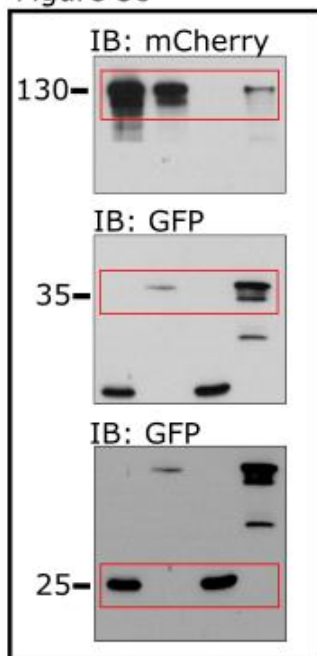

Figure 5d

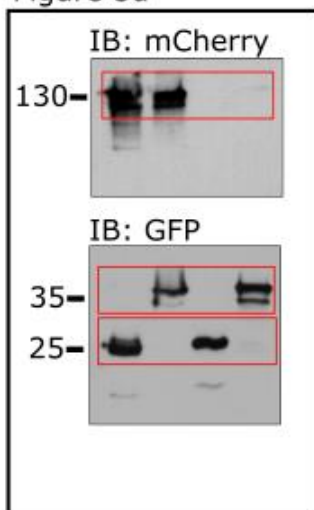

Figure 5e

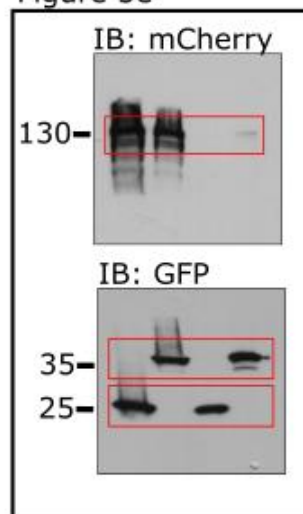

Figure 5f

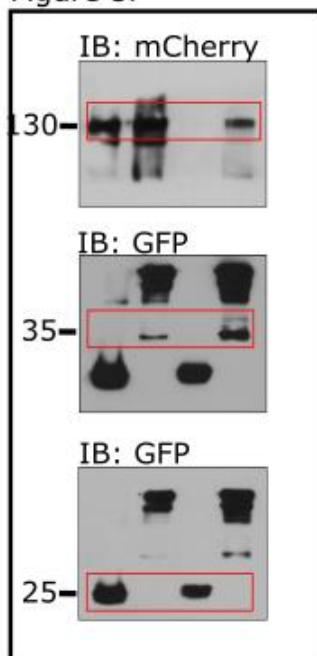

Figure 5g

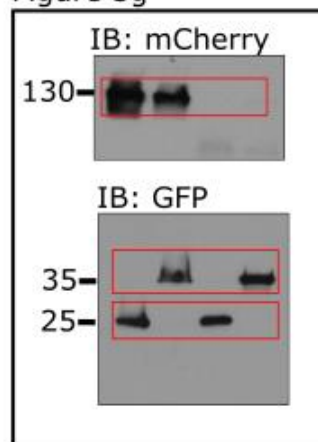

Figure 5h

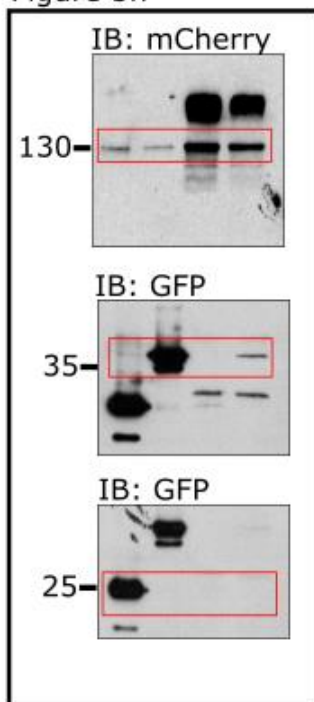

Figure 5i

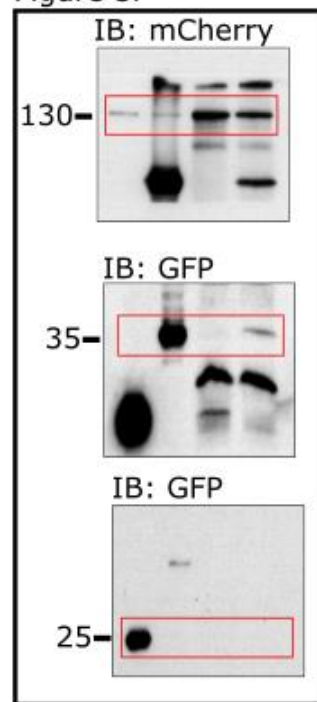

Figure 5j

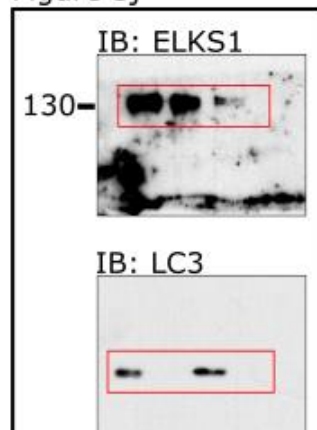

Figure 5k

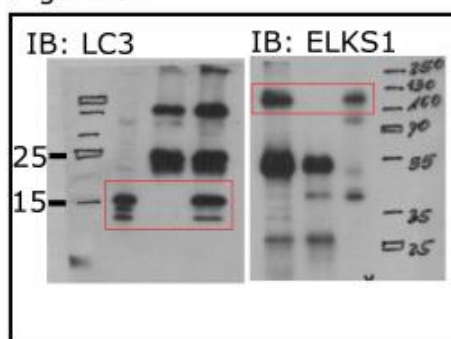

Figure 5l

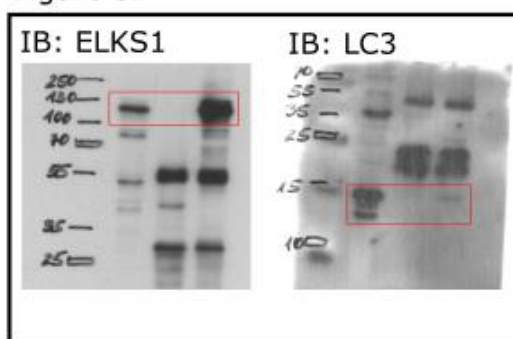

Figure 6a

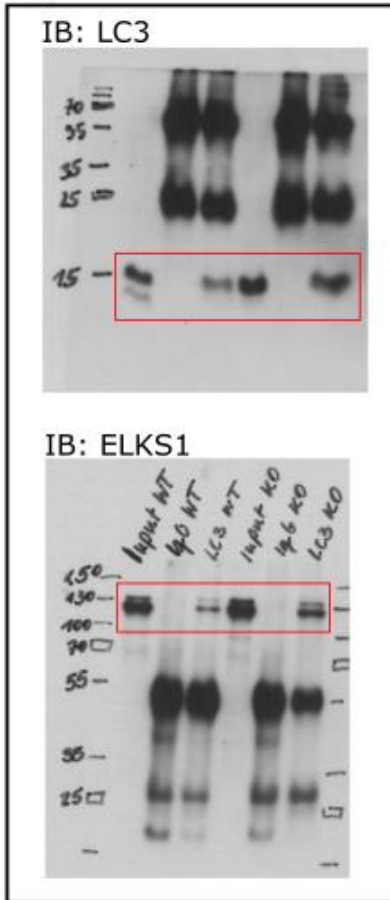

Figure 6b

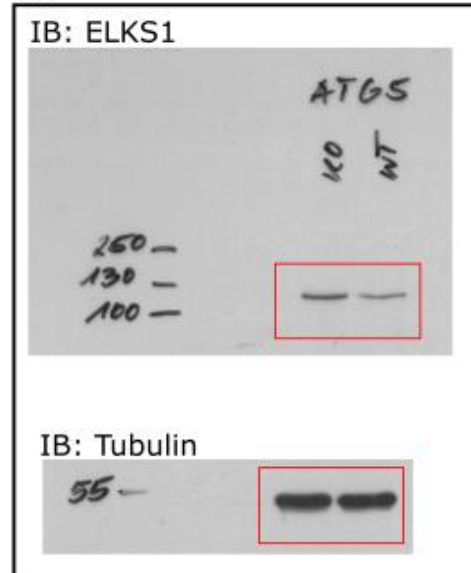

Figure 6g

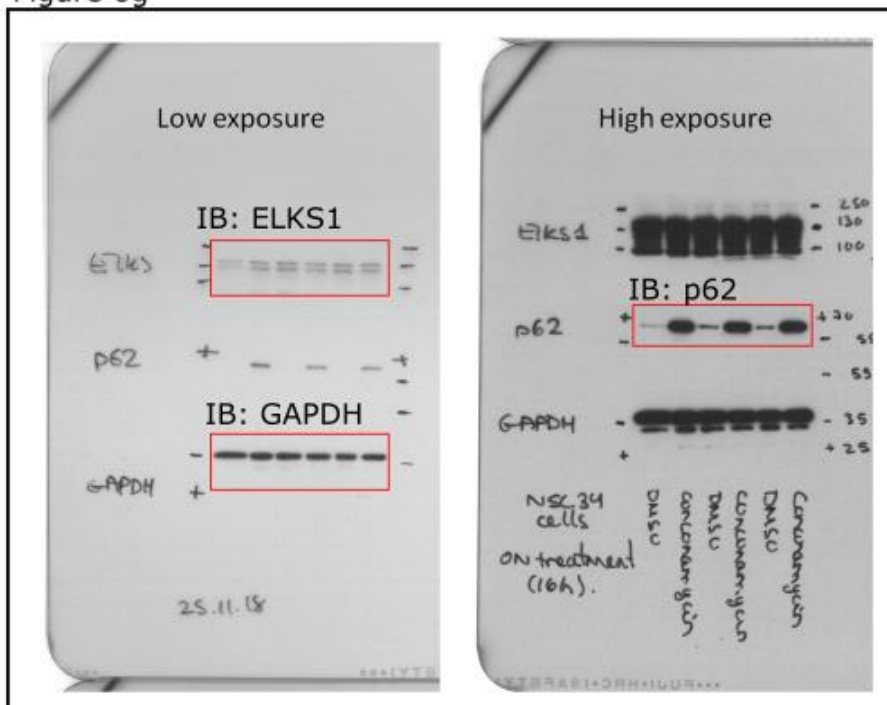

Figure 7a

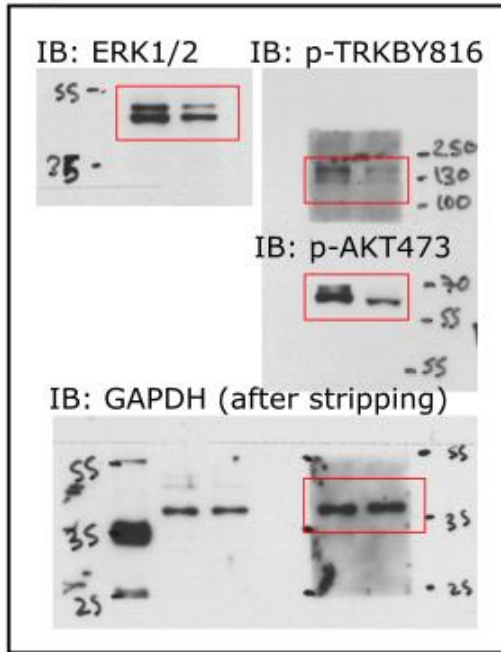

Figure 7e

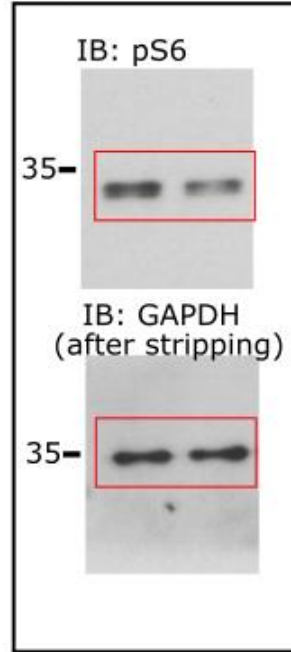

Figure 7i

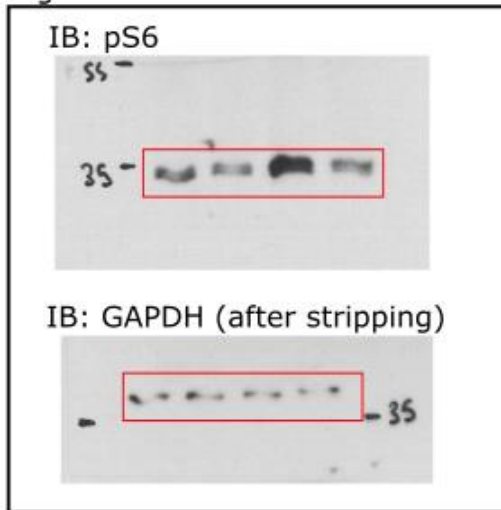

Supplementary Figure 1e

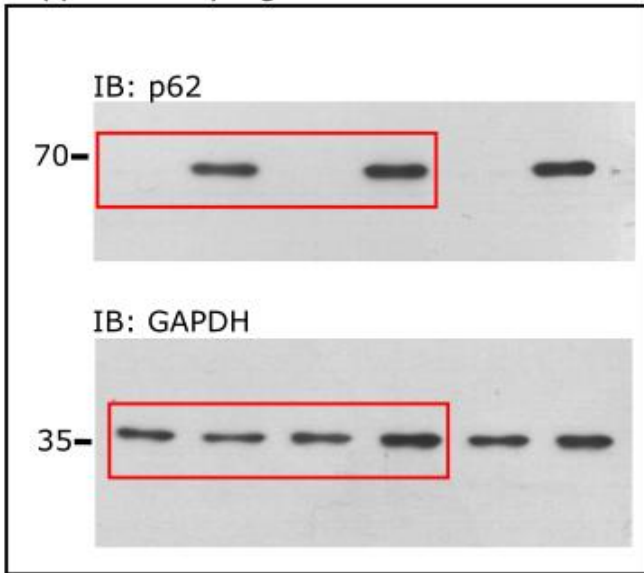

Supplementary Figure 1g

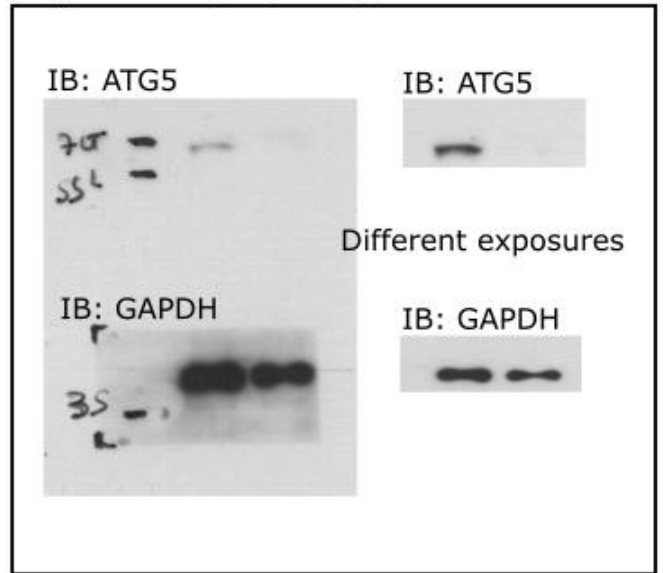

Supplementary Figure 2h

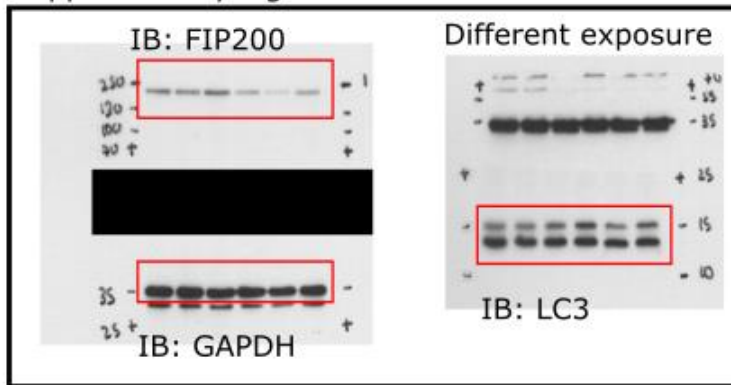

Supplementary Figure 2k

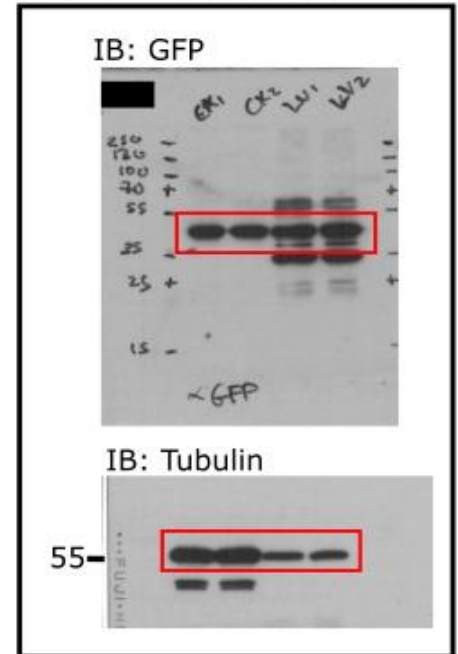

Supplementary Figure 2n

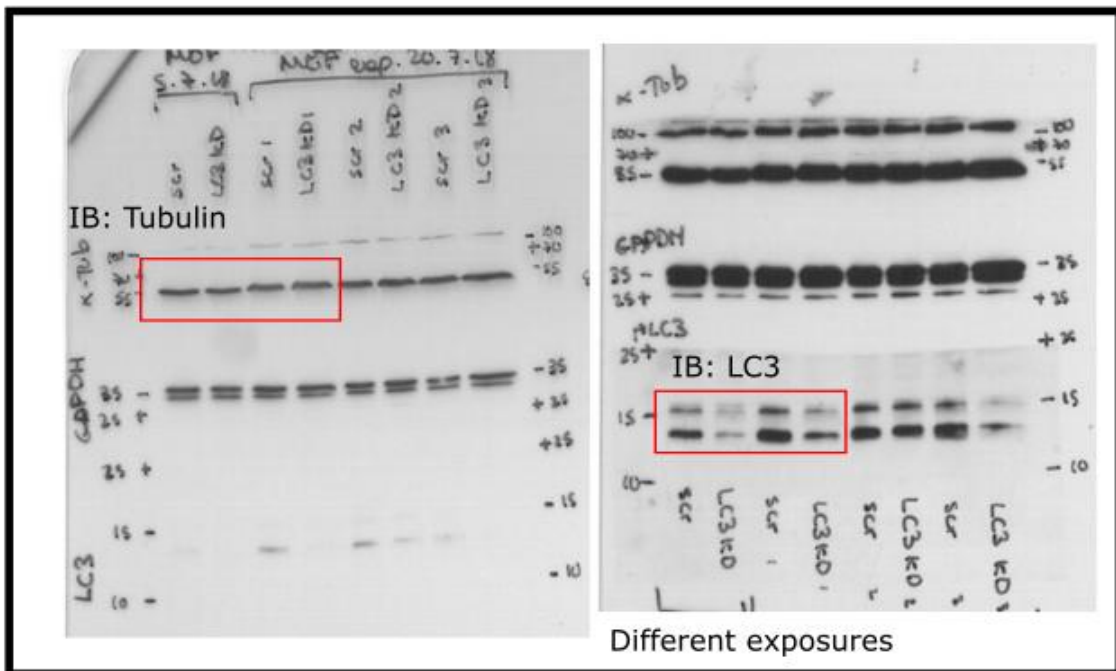



Supplementary Figure 3g

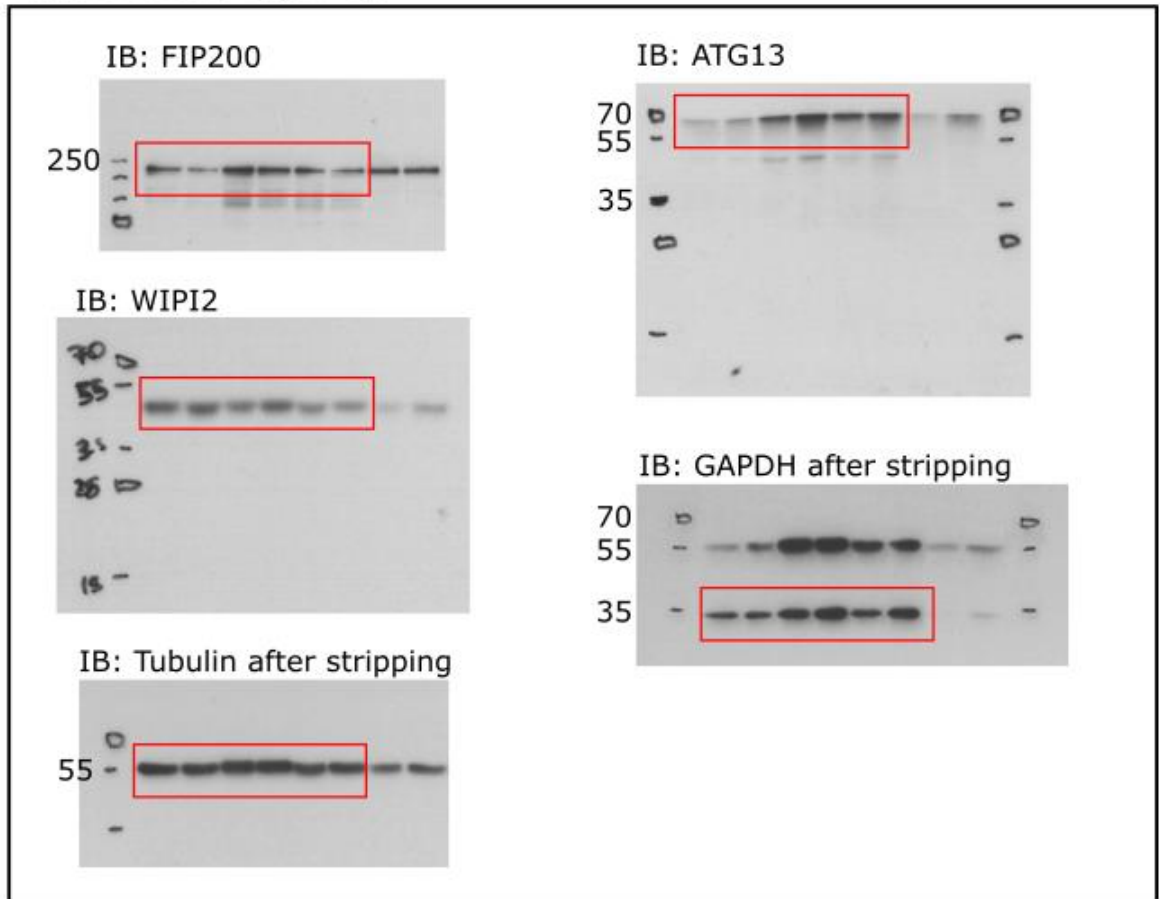

Supplementary Figure 4a

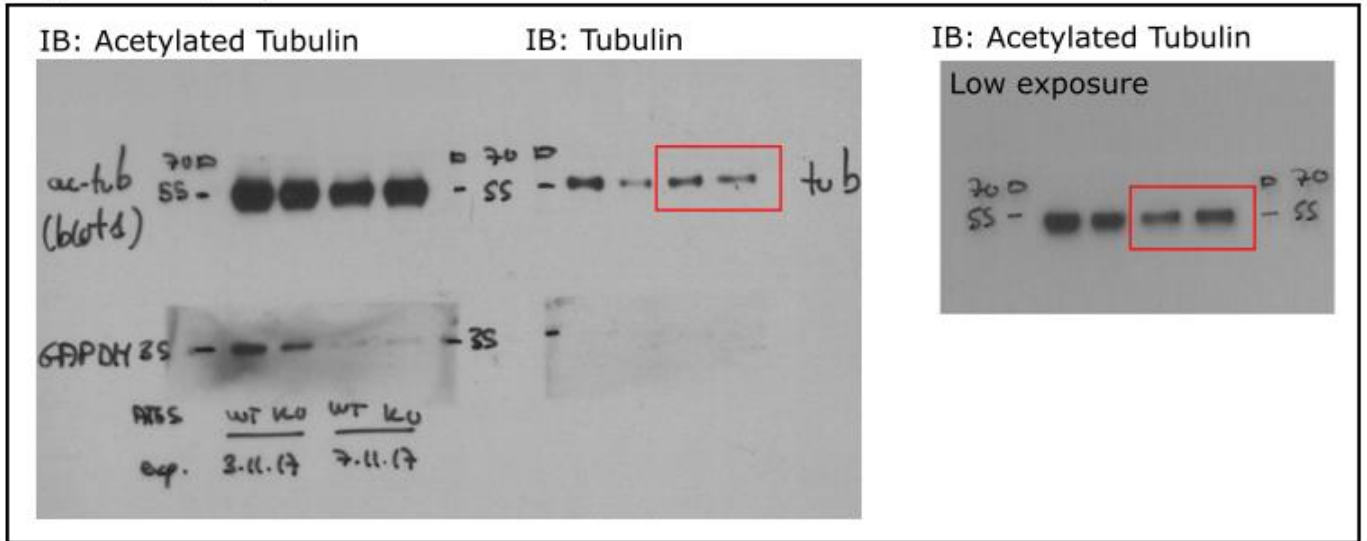

Supplementary Figure 4e

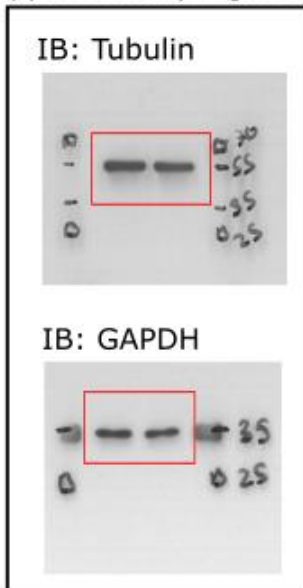

Supplementary Figure 4g

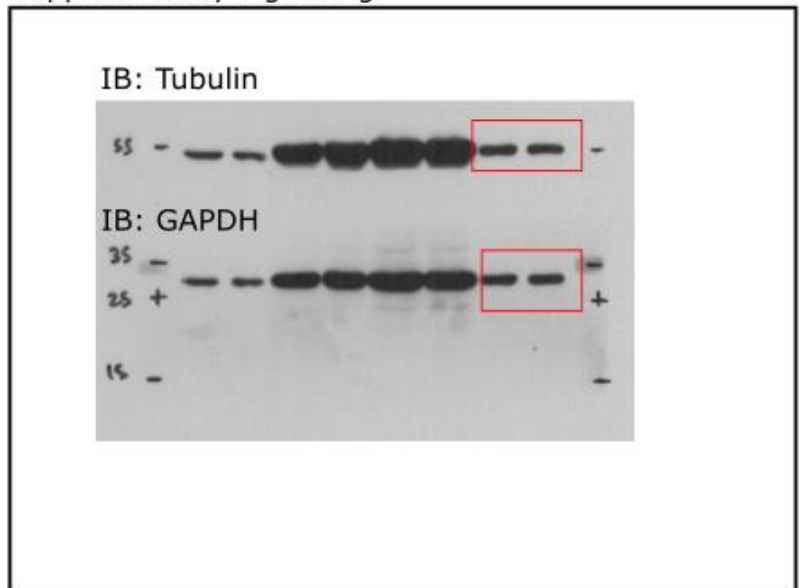

Supplementary Figure 5a

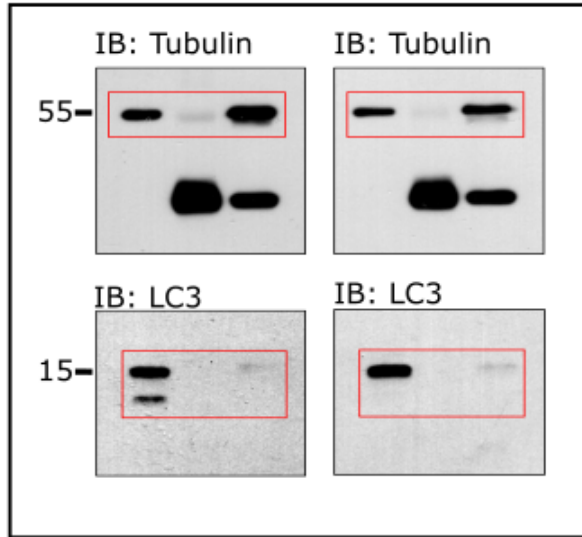

Supplementary Figure 5b

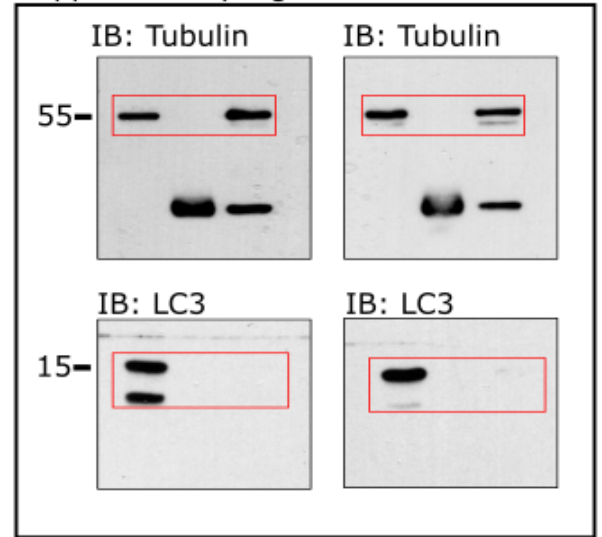

Supplementary Figure 6f

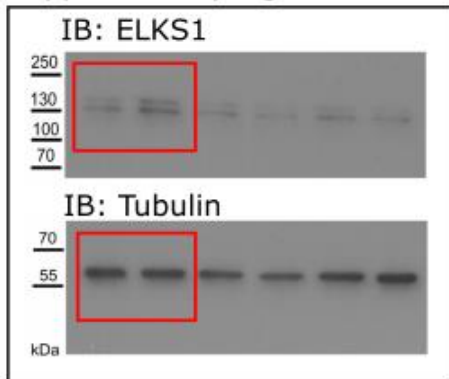

Supplementary Figure 6h

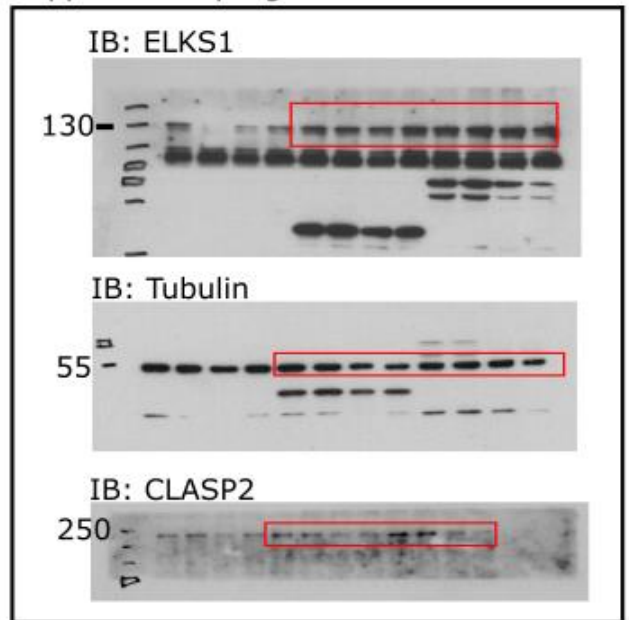

Supplementary Figure 6k

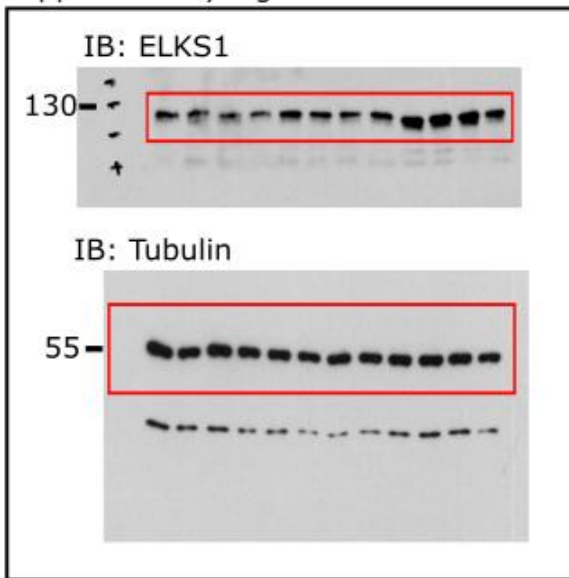

Supplementary Figure 6l

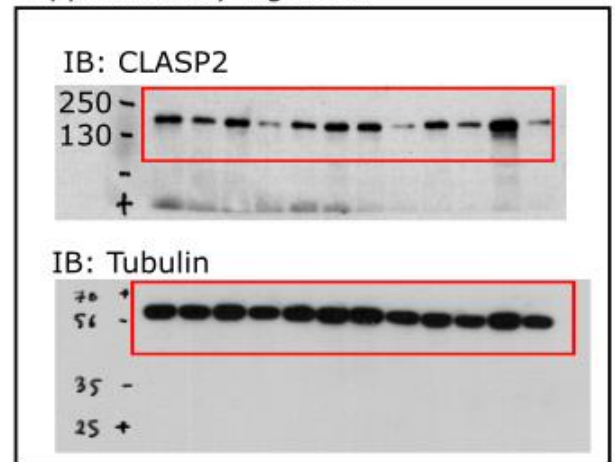

Supplementary Figure 6n

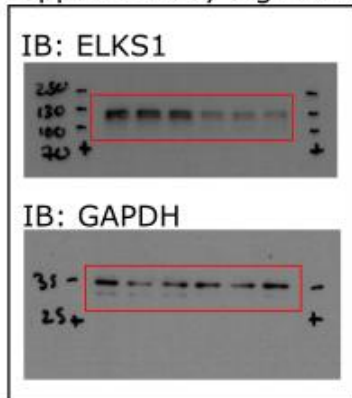

Supplementary Figure 6s

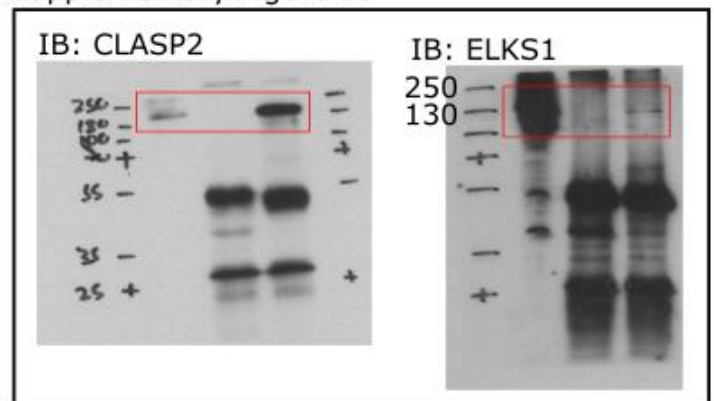

Supplementary Figure 7e

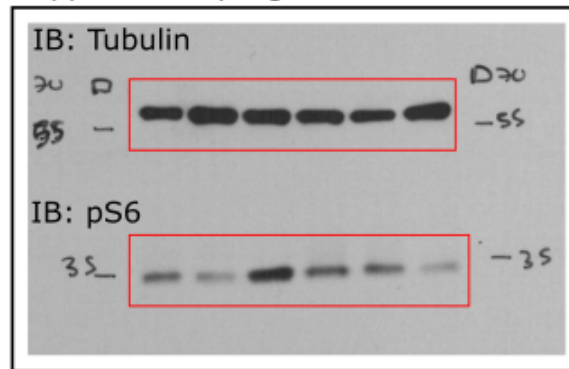

## Supplementary figure 8. Uncropped original scans of WB membranes

### Supplementary references:

1. Kye, M.J. *et al.* NMDA mediated contextual conditioning changes miRNA expression. *PloS one* **6**, e24682-e24682 (2011).
2. Kononenko, N.L. *et al.* Compromised fidelity of endocytic synaptic vesicle protein sorting in the absence of stonin 2. *Proceedings of the National Academy of Sciences of the United States of America* **110**, E526-535 (2013).
3. Kononenko, N.L. *et al.* Retrograde transport of TrkB-containing autophagosomes via the adaptor AP-2 mediates neuronal complexity and prevents neurodegeneration. *Nature Communications* **8**, 1-16 (2017).
