# Supplementary material for: Autophagy lipidation machinery regulates axonal microtubule dynamics but is dispensable for survival of mammalian neurons
Source: PubMed Central journal article supplement (PMC7093409; doi:10.1038/s41467-020-15287-9), 2020-03-24
Supplement: 41467_2020_15287_MOESM3_ESM.pdf [file 41467_2020_15287_MOESM3_ESM.pdf]

## Reporting Summary

Nature Research wishes to improve the reproducibility of the work that we publish. This form provides structure for consistency and transparency in reporting. For further information on Nature Research policies, see [Authors & Referees](#) and the [Editorial Policy Checklist](#).

### Statistics

For all statistical analyses, confirm that the following items are present in the figure legend, table legend, main text, or Methods section.

n/a Confirmed

- |                                     |                                     |                                                                                                                                                                                                                                                            |
|-------------------------------------|-------------------------------------|------------------------------------------------------------------------------------------------------------------------------------------------------------------------------------------------------------------------------------------------------------|
| <input type="checkbox"/>            | <input checked="" type="checkbox"/> | The exact sample size ( $n$ ) for each experimental group/condition, given as a discrete number and unit of measurement                                                                                                                                    |
| <input type="checkbox"/>            | <input checked="" type="checkbox"/> | A statement on whether measurements were taken from distinct samples or whether the same sample was measured repeatedly                                                                                                                                    |
| <input type="checkbox"/>            | <input checked="" type="checkbox"/> | The statistical test(s) used AND whether they are one- or two-sided<br><i>Only common tests should be described solely by name; describe more complex techniques in the Methods section.</i>                                                               |
| <input checked="" type="checkbox"/> | <input type="checkbox"/>            | A description of all covariates tested                                                                                                                                                                                                                     |
| <input type="checkbox"/>            | <input checked="" type="checkbox"/> | A description of any assumptions or corrections, such as tests of normality and adjustment for multiple comparisons                                                                                                                                        |
| <input type="checkbox"/>            | <input checked="" type="checkbox"/> | A full description of the statistical parameters including central tendency (e.g. means) or other basic estimates (e.g. regression coefficient) AND variation (e.g. standard deviation) or associated estimates of uncertainty (e.g. confidence intervals) |
| <input type="checkbox"/>            | <input checked="" type="checkbox"/> | For null hypothesis testing, the test statistic (e.g. $F$ , $t$ , $r$ ) with confidence intervals, effect sizes, degrees of freedom and $P$ value noted<br><i>Give <math>P</math> values as exact values whenever suitable.</i>                            |
| <input checked="" type="checkbox"/> | <input type="checkbox"/>            | For Bayesian analysis, information on the choice of priors and Markov chain Monte Carlo settings                                                                                                                                                           |
| <input checked="" type="checkbox"/> | <input type="checkbox"/>            | For hierarchical and complex designs, identification of the appropriate level for tests and full reporting of outcomes                                                                                                                                     |
| <input checked="" type="checkbox"/> | <input type="checkbox"/>            | Estimates of effect sizes (e.g. Cohen's $d$ , Pearson's $r$ ), indicating how they were calculated                                                                                                                                                         |

*Our web collection on [statistics for biologists](#) contains articles on many of the points above.*

### Software and code

Policy information about [availability of computer code](#)

|                 |                                                                                                                                                                                                                                                                                                 |
|-----------------|-------------------------------------------------------------------------------------------------------------------------------------------------------------------------------------------------------------------------------------------------------------------------------------------------|
| Data collection | Leica LAS X Version 2.0.0.14332; Micro-Manager1.4; 7500 Fast Software v2.0.6; Evos Software (EVOS FL Auto2, Life Technologies), EthoVision®XT Noldus, Camera OneView 4K 16 bit (Gatan), DigitalMicrograph (Gatan, JEOL JEM2100PLUS)                                                             |
| Data analysis   | Fiji ImageJ 1.52p; KymoMaker ( <a href="http://www.pharm.hokudai.ac.jp/shinkei/Kymomaker.html">http://www.pharm.hokudai.ac.jp/shinkei/Kymomaker.html</a> ); Microsoft Excel 2016; WAVE version 2.6.0. (Seahorse assay); Maxquant version 1.5.3.8 (Mass spectrometry data), GraphPad Pris 8.0.1. |

For manuscripts utilizing custom algorithms or software that are central to the research but not yet described in published literature, software must be made available to editors/reviewers. We strongly encourage code deposition in a community repository (e.g. GitHub). See the Nature Research [guidelines for submitting code & software](#) for further information.

### Data

Policy information about [availability of data](#)

All manuscripts must include a [data availability statement](#). This statement should provide the following information, where applicable:

- Accession codes, unique identifiers, or web links for publicly available datasets
- A list of figures that have associated raw data
- A description of any restrictions on data availability

All data supporting the findings described in this study are available from the corresponding author upon reasonable request. Source data from all representative blots shown in this study as well as data underlying all quantitative analysis performed in this study are provided with the manuscript as a Source Data file. Data generated from mass spectrometry have been deposited in the ProteomeXchange Consortium via the PRIDE (PubMed ID: 26527722) partner repository with the dataset identifier PXD011279.

## Field-specific reporting

Please select the one below that is the best fit for your research. If you are not sure, read the appropriate sections before making your selection.

- Life sciences       Behavioural & social sciences       Ecological, evolutionary & environmental sciences

For a reference copy of the document with all sections, see [nature.com/documents/nr-reporting-summary-flat.pdf](https://www.nature.com/documents/nr-reporting-summary-flat.pdf)

## Life sciences study design

All studies must disclose on these points even when the disclosure is negative.

|                 |                                                                                                                                                                                                                                                                                                                                                                                                                                                                                                                       |
|-----------------|-----------------------------------------------------------------------------------------------------------------------------------------------------------------------------------------------------------------------------------------------------------------------------------------------------------------------------------------------------------------------------------------------------------------------------------------------------------------------------------------------------------------------|
| Sample size     | Sample sizes were not chosen based on pre-specified effect size. Instead, multiple independent experiments were carried out using several sample replicates as detailed in the figure legends. For all experiments there was enough statistical power to detect the corresponding effect size.                                                                                                                                                                                                                        |
| Data exclusions | Data was only excluded when the quality of the sample was not optimal. Predefined quality criteria were: in living samples- vacuolization or other signs of cellular degeneration, normal cell morphology and protein transport (which is usually hampered in unhealthy cells) and image streams that are in focus; proper sample preparation and mounting in fixed samples.                                                                                                                                          |
| Replication     | Each experiment was replicated a minimum of three times and data was reliably reproduced with each replication attempt.                                                                                                                                                                                                                                                                                                                                                                                               |
| Randomization   | Mice were genotyped for allocation into control (Cre negative) or experimental (Cre positive) groups. Within each group, all animals were generally used for experimental procedures, so no randomization was applied.                                                                                                                                                                                                                                                                                                |
| Blinding        | Animals were genotyped prior to experiments, i.e. no blinding was used to allocate experimental groups. Immunofluorescence image data collection and analysis of axons was not blinded since a axonal swellings phenotype differentiated controls from KO groups. Data analysis of indistinguishable cellular structures, such as dendrites and soma of the neuron, were performed blinded. Western blot data were not blindly analysed since either KO protein or siRNA treatment were assessed for each experiment. |

## Reporting for specific materials, systems and methods

We require information from authors about some types of materials, experimental systems and methods used in many studies. Here, indicate whether each material, system or method listed is relevant to your study. If you are not sure if a list item applies to your research, read the appropriate section before selecting a response.

### Materials & experimental systems

| n/a                                 | Included in the study                                           |
|-------------------------------------|-----------------------------------------------------------------|
| <input type="checkbox"/>            | <input checked="" type="checkbox"/> Antibodies                  |
| <input type="checkbox"/>            | <input checked="" type="checkbox"/> Eukaryotic cell lines       |
| <input checked="" type="checkbox"/> | <input type="checkbox"/> Palaeontology                          |
| <input type="checkbox"/>            | <input checked="" type="checkbox"/> Animals and other organisms |
| <input checked="" type="checkbox"/> | <input type="checkbox"/> Human research participants            |
| <input checked="" type="checkbox"/> | <input type="checkbox"/> Clinical data                          |

### Methods

| n/a                                 | Included in the study                           |
|-------------------------------------|-------------------------------------------------|
| <input checked="" type="checkbox"/> | <input type="checkbox"/> ChIP-seq               |
| <input checked="" type="checkbox"/> | <input type="checkbox"/> Flow cytometry         |
| <input checked="" type="checkbox"/> | <input type="checkbox"/> MRI-based neuroimaging |

## Antibodies

### Antibodies used

Rabbit polyclonal anti-ATG16L1 MBL Cat# PM040, Lot. 017  
 Rabbit monoclonal (clone EPR1755(2)) anti-ATG5 abcam Cat# ab108327, Lot. GR312199-7  
 Rabbit polyclonal anti-ATG9 Novus Biologicals Cat# NB110-56893  
 Rabbit polyclonal anti-ATG13 Arigo (Biomol GmbH) Cat# ARG55112.050, Lot. 81210  
 Guinea pig polyclonal anti-Bassoon Synaptic Systems Cat# 141 004, Lot. 1-19  
 Rabbit polyclonal anti-CASPASE-3 cleaved (Asp175) Cell Signaling Cat# 9661, Lot. 45  
 Rabbit polyclonal anti-c-FOS Synaptic Systems Cat# 226 003, Lot. 22600313-41  
 Rabbit polyclonal anti-CLASP2 Millipore Cat# ABT263, Lot. 3040386  
 Goat polyclonal anti-DNCT1 abcam Cat# ab11806  
 Rabbit polyclonal anti-ELKS1 Novus Biologicals Cat# NBP1-88178  
 Rabbit monoclonal anti-FIP200 Cell Signaling Cat# 12436, Lot. 1  
 Mouse monoclonal anti-GAPDH (clone 71.1) Sigma-Aldrich Cat# G8795  
 Chicken polyclonal anti-GFP abcam Cat# ab13970, Lot. GR3190550-15  
 Mouse monoclonal (clone is not provided) anti-GFP Takara Bio Clontech Cat# 632375

Rabbit polyclonal anti-LC3B Novus Biologicals Cat# NB600-1384SS, Lot. CK-1  
 Mouse monoclonal (clone 4E12) anti-LC3A/B MBL Cat# M152-3, Lot. 051  
 Mouse monoclonal anti-MAP2 (clone HM-2) Sigma-Aldrich Cat# M9942, Lot. 036M4804V  
 Mouse monoclonal anti-MAPK activated (clone MAPK-YT) Sigma-Aldrich Cat# M8159, Lot. 065M4806V  
 Rabbit polyclonal anti-mCherry abcam Cat# ab167453, Lot. GR3265215-2  
 Mouse monoclonal anti-mCherry (clone 1C51) Novus Biologicals Cat# NBP1-96752  
 Rabbit polyclonal anti-P-S6 Ribosomal Protein (Ser235/236) Cell Signaling Cat# 2211, Lot. 23  
 Guinea pig polyclonal anti-p62 Progen Cat# GP62-C, Lot. 703241-02  
 Rabbit monoclonal anti-P-AKT (clone D9E) Cell Signaling Cat# 4060, Lot.19  
 Rabbit monoclonal anti-RAB7 (clone D95F2) Cell Signaling Cat#9367S  
 Rabbit polyclonal anti-SYB2 Synaptic Systems Cat# 104 202  
 Mouse monoclonal anti-Synapsin 1 (clone 46.1) Synaptic Systems Cat# 106 001  
 Rabbit polyclonal anti-P-TRKB (Y816) abcam Cat# ab75173  
 Mouse monoclonal anti- $\alpha$ -Tubulin (clone 3A2) Synaptic Systems Cat# 302 211, Lot. 1-6  
 Mouse monoclonal anti- $\beta$ -3-Tubulin (clone 2G10-TB3) eBioscience Cat# 14-4510-80, Lot. 4315809  
 Rabbit monoclonal anti- $\alpha$ -Tubulin acetylated (Lys40, clone D20G3) Cell Signaling Cat# 5335, Lot. 5  
 Mouse monoclonal anti- $\alpha$ -Tubulin tyrosinated (clone TUB-1A2) Sigma-Aldrich Cat# T9028  
 Rabbit polyclonal anti- $\alpha$ -Tubulin detyrosinated Millipore Cat# AB3201, Lot: 2886375  
 Rabbit polyclonal anti- $\alpha$ -Tubulin  $\Delta$ 2 Synaptic Systems Cat# 302 213, Lot: 30221313  
 Rabbit antiserum anti-Ubiquitin Sigma-Aldrich Cat# U5379  
 Mouse monoclonal anti-WIP1 (clone MCA5780GA) BioRad Cat# AB\_10845951, Lot. 1801  
 Goat anti-Mouse IgG (H+L) peroxidase-conjugated Jackson ImmunoResearch Cat# 115-035-003  
 Goat anti-Mouse IgG, light chain specific, peroxidase conjugated Jackson ImmunoResearch Cat# 115-035-174  
 Goat anti-Rabbit IgG (H+L) peroxidase-conjugated Jackson ImmunoResearch Cat# 111-035-003  
 Goat anti-Guinea Pig IgG (H+L) peroxidase-conjugated Jackson ImmunoResearch Cat# 106-035-003, Lot. 124397  
 Normal Rabbit IgG Cell Signaling Cat# 2729, Lot. 8  
 Normal Mouse IgG Millipore Cat# 12-371, Lot. 2757162  
 Alexa Fluor 488 Goat anti-Mouse IgG Thermo Fisher Sci Cat# A-11029, Lot. 1942237  
 Alexa Fluor 488 Goat anti-Rabbit IgG Thermo Fisher Sci Cat# A-11034, Lot. 1937195  
 Alexa Fluor 488 Goat anti-Chicken IgG Thermo Fisher Sci Cat# A-11039, Lot. 1691381  
 Alexa Fluor 568 Goat anti-Mouse IgG Thermo Fisher Sci Cat# A-11031, Lot. 1946341  
 Alexa Fluor 568 Goat anti-Rabbit IgG Thermo Fisher Sci Cat# A-11036, Lot. 1705911  
 Alexa Fluor 568 Donkey anti-Goat IgG Thermo Fisher Sci Cat# A-11057, Lot. 2044862  
 Alexa Fluor 647 Goat anti-Mouse IgG Thermo Fisher Sci Cat# A-21236, Lot. 1705800  
 Alexa Fluor 647 Goat anti-Rabbit IgG Thermo Fisher Sci Cat# A-21245, Lot. 2098544  
 Alexa Fluor 647 Goat anti-Guinea Pig IgG Thermo Fisher Sci Cat# A-21450, Lot. 2110845  
 Alexa Fluor 647 Goat anti-Rat IgG Thermo Fisher Sci Cat# A-21247, Lot. 2005938  
 Abberior STAR 635P Goat anti-mouse IgG Abberior Cat#ST635P

## Validation

Rabbit polyclonal anti-ATG16L1 MBL Cat# PM040: manufacturer validation (<https://ruo.mbl.co.jp/bio/dtl/A/?pcd=PM040>). Seto, S., Tsujimura, K., Horii, T., et al. Autophagy adaptor protein p62/SQSTM1 and autophagy-related gene Atg5 mediate autophagosome formation in response to Mycobacterium tuberculosis infection in dendritic cells. *PLoS One* 8(12) (2013). Tested by WB in mouse cells.

Rabbit monoclonal anti-ATG5 abcam Cat# ab108327: manufacturer validation (<https://www.abcam.com/agg5latg5-antibody-epr17552-ab108327.html>). Ma, Z., Li, F., Chen, L. et al. Autophagy promotes hepatic differentiation of hepatic progenitor cells by regulating the Wnt/ $\beta$ -catenin signaling pathway. *J Mol Hist* 50, 75–90 (2019). Tested by WB in mouse cells

Rabbit polyclonal anti-ATG9 Novus Biologicals Cat# NB110-56893: manufacturer validation ([https://www.novusbio.com/products/atg9a-antibody\\_nb110-56893#datasheet](https://www.novusbio.com/products/atg9a-antibody_nb110-56893#datasheet)). Kaushik, S., Cuervo, A. Degradation of lipid droplet-associated proteins by chaperone-mediated autophagy facilitates lipolysis. *Nat Cell Biol* 17, 759–770 (2015). Tested by ICC in mouse cells.

Rabbit polyclonal anti-ATG13 Arigo (Biomol GmbH) Cat# ARG55112.050: manufacturer validation (<https://www.arigobio.com/anti-ATG13-antibody-ATG13-ARG10995.html>). Tested in WB in mouse cells.

Guinea pig polyclonal anti-Bassoon Synaptic Systems Cat# 141 004: manufacturer validation (<https://www.sysy.com/products/bassoon/facts-141004.php>). Jäpel, M., Gerth, F., Sakaba, T., et al. Intersectin-Mediated Clearance of SNARE Complexes Is Required for Fast Neurotransmission. *Cell reports* 30 (2), 409-420 (2020). Tested by ICC in mouse cells.

Rabbit polyclonal anti-CASPASE-3 cleaved (Asp175) Cell Signaling Cat# 9661: manufacturer validation (<https://www.cellsignal.com/products/primary-antibodies/cleaved-caspase-3-asp175-antibody/9661>). Liu, Z., Wang, X., et al. TNF $\alpha$ -induced Up-regulation of Ascl2 Affects the Differentiation and Proliferation of Neural Stem Cells. *Aging and Disease* (2019). Tested in IHC in mouse tissue. Lachance, V., Wang, Q., et al. Autophagy protein NRBF2 has reduced expression in Alzheimer's brains and modulates memory and amyloid-beta homeostasis in mice. *Mol Neurodegeneration* (2019). Tested by WB in brain mouse samples.

Rabbit polyclonal anti-c-FOS Synaptic Systems Cat# 226 003: manufacturer validation (<https://www.sysy.com/products/c-fos/facts-226003.php>). Grippo RM, et al., Dopamine Signaling in the Suprachiasmatic Nucleus Enables Weight Gain Associated with Hedonic Feeding. *Current biology* (2019). Tested by IHC in mouse cells.

Rabbit polyclonal anti-CLASP2 Millipore Cat# ABT263: manufacture validation (<https://www.sigmaaldrich.com/catalog/product/mm/abt263?lang=es&region=ES>). No previously cited. Validated this paper by either knockdown of CLASP2 via siRNA (WB and ICC), and co-localization with GFP-CLASP2 transfected cells (ICC).

Goat polyclonal anti-DNCT1 abcam Cat# ab11806: manufacturer validation (<https://www.abcam.com/dctn1p150-glued-antibody-ab11806.html>). Magnani E., et al. Interaction of tau protein with the dynactin complex. *EMBO J* (2007). Tested by ICC/IF in mouse cells.

Rabbit polyclonal anti-ELKS1 Novus Biologicals Cat# NBP1-88178: manufacturer validation ([https://www.novusbio.com/products/elks-antibody\\_nbp1-88178](https://www.novusbio.com/products/elks-antibody_nbp1-88178)). No previously cited. Validated in the lab by either knockdown of ELKS via siRNA (WB and ICC (this paper)), and co-localization with tdTomato-ELKS1 transfected cells (ICC).

Rabbit monoclonal anti-FIP200 Cell Signaling Cat# 12436: manufacturer validation (<https://www.cellsignal.com/products/primary-antibodies/fip200-d10d11-rabbit-mab/12436?Ns=product.displayName%7C0&N=4294959755+4294956287&Nrpp=200&fromPage=plp>). Lim J et al., Autophagy regulates inflammatory programmed cell death via turnover of RHIM-domain proteins. *eLIFE* (2019). Tested by WB in mouse cells.

Mouse monoclonal anti-GAPDH Sigma-Aldrich Cat# G8795: manufacturer validation (<https://www.sigmaaldrich.com/catalog/product/sigma/g8795?lang=es&region=ES>). Naoya Yuhki et. al Comparative genome organization of human, murine, and feline MHC class II region. *Genome research* (2003). Tested by WB in mouse cells.

Chicken polyclonal anti-GFP abcam Cat# ab13970: manufacturer validation (<https://www.abcam.com/gfp-antibody-ab13970.html>). Handara G et al. The role of agrin, Lrp4 and MuSK during dendritic arborization and synaptogenesis in cultured embryonic CNS neurons. *Dev Biol* (2019). Tested by ICC in mouse cells.

Mouse monoclonal anti-GFP Takara Bio Clontech Cat# 632375: manufacturer validation (<https://www.takarabio.com/search-results?term=632375>). Previously not cited.

Rabbit polyclonal anti-LC3B Novus Biologicals Cat# NB600-1384S: manufacturer validation ([https://www.novusbio.com/products/lc3b-antibody\\_nb600-1384](https://www.novusbio.com/products/lc3b-antibody_nb600-1384)). He X., et al. RNF34 functions in immunity and selective mitophagy by targeting MAVS for autophagic degradation. *The EMBO Journal* (2019). Tested by WB in mouse cells.

Mouse monoclonal anti-LC3A/B MBL Cat# M152-3: manufacturer validation (<https://ruo.mbl.co.jp/bio/e/dtl/A/?pcd=M152-3>). Kovacs JR et al. Autophagy promotes T-cell survival through degradation of proteins of the cell death machinery. *Cell Death Differ.* (2012). Tested by ICC in mouse cells.

Mouse monoclonal anti-MAP2 Sigma-Aldrich Cat# M9942: manufacturer validation (<https://www.sigmaaldrich.com/catalog/product/sigma/m9942?lang=es&region=ES>). Chen YL., et al. Modulation of mGluR-dependent MAP1B translation and AMPA receptor endocytosis by microRNA miR-146a-5p. *The Journal of Neuroscience* 33(21), 9013-9020, (2013). Tested by ICC in mouse cells.

Mouse monoclonal anti-MAPK activated (P-ERK-1&2) Sigma-Aldrich Cat# M8159: manufacturer validation (<https://www.sigmaaldrich.com/catalog/product/sigma/m8159?lang=es&region=ES>). Blizinsky KD et al., Reversal of dendritic phenotypes in 16p11. 2 microduplication mouse model neurons by pharmacological targeting of a network hub. *Proceedings of the National Academy of Sciences of the USA* (2016). Tested by WB in mouse cells.

Rabbit polyclonal anti-mCherry abcam Cat# ab167453: manufacturer validation (<https://www.abcam.com/mcherry-antibody-ab167453.html>). Hoffmann S., et al. Light-Activated ROS Production Induces Synaptic Autophagy. *J Neurosci* (2019). Tested by ICC and WB in mouse cells.

Mouse monoclonal anti-mCherry Novus Biologicals Cat# NBP1-96752: manufacturer validation ([https://www.novusbio.com/products/mcherry-antibody-1c51\\_nbp1-96752](https://www.novusbio.com/products/mcherry-antibody-1c51_nbp1-96752)). Choi, E et al., Mitotic Regulators and the SHP2-MAPK Pathway Promote Insulin Receptor Endocytosis and Feedback Regulation of Insulin Signaling. *Nat Commun* (2018). Tested by ICC/IF in mouse cells.

Rabbit polyclonal anti-P-S6 Ribosomal Protein (Ser235/236) Cell Signaling Cat# 2211: manufacturer validation (<https://www.cellsignal.com/products/primary-antibodies/phospho-s6-ribosomal-protein-ser235-236-antibody/2211>). Tripathi, P., Rodríguez-Muela, N., et al., Reactive Astrocytes Promote ALS-like Degeneration and Intracellular Protein Aggregation in Human Motor Neurons by Disrupting Autophagy through TGF- $\beta$ 1. *Stem Cell Reports* (2017). Tested by WB in mouse cells.

Guinea pig polyclonal anti-p62 Progen Cat# GP62-C: manufacturer validation (<https://www.progen.com/anti-p62-sqstm1-c-terminus-guinea-pig-polyclonal-serum.html>). Domke LM and Franke WW. The cell-cell junctions of mammalian testes: II. The lamellar smooth muscle monolayer cells of the peritubular wall are laterally connected by vertical adherens junctions—a novel architectonic cell-cell junction system. *Cell and Tissue Research* (2019). Tested by WB and ICC/IF in mouse cells.

Rabbit monoclonal anti-P-AKT (Ser473) Cell Signaling Cat# 4060: manufacturer validation (<https://www.cellsignal.com/products/primary-antibodies/phospho-akt-ser473-d9e-xp-rabbit-mab/4060>). Tian, S., Jia, W., et al. Dual-specificity tyrosine

phosphorylation-regulated kinase 1A ameliorates insulin resistance in neurons by up-regulating IRS-1 expression. *The Journal of Biological Chemistry* (2019). Tested by WB in mouse cells.

Rabbit monoclonal anti-RAB7 Cell Signaling Cat#9367S: manufacturer validation (<https://www.cellsignal.com/products/primary-antibodies/rab7-d95f2-xp-rabbit-mab/9367>). Hosaka, K., Yang, Y., et al. Dual roles of endothelial FGF-2-FGFR1-PDGF-BB and perivascular FGF-2-FGFR2-PDGFR $\beta$  signaling pathways in tumor vascular remodeling. *Cell Discovery* (2018). Tested by ICC in mouse cells.

Rabbit polyclonal anti-SYB2 Synaptic Systems Cat# 104 202: manufacturer validation (<https://www.sysy.com/products/s-brevin2/facts-104202.php>). Liu C, Kershberg L, Wang J, Schneeberger S, Kaeser PS. Dopamine Secretion Is Mediated by Sparse Active Zone-like Release Sites. *Cell* (2018). Tested by WB and ICC in mouse cells.

Mouse monoclonal anti-Synapsin 1 Synaptic Systems Cat# 106 001: manufacturer validation (<https://www.sysy.com/products/synapsin/facts-106001.php>). Brockhaus J, Brüggem B, Missler M. Imaging and Analysis of Presynaptic Calcium Influx in Cultured Neurons Using synGCaMP6f. *Frontiers in synaptic neuroscience* (2019). Tested by ICC in mouse cells.

Rabbit polyclonal anti-P-TRKB (Y816) abcam Cat# ab75173: manufacturer validation (<https://www.citeab.com/antibodies/756719-ab75173-anti-trkb-phospho-y816-antibody>). Li, W., Calfa, G., et al. Activity-dependent BDNF release and TRPC signaling is impaired in hippocampal neurons of Mecp2 mutant mice. *Proceedings of the National Academy of Sciences of the United States of America* (2012). Tested by IF, IHC and WB in mouse cells.

Mouse monoclonal anti- $\alpha$ -Tubulin Synaptic Systems Cat# 302 211: manufacturer validation (<https://www.sysy.com/products/tubulin/facts-302211.php>). Götzke H et al., The ALFA-tag is a highly versatile tool for nanobody-based bioscience applications. *Nature communications* (2019). Tested by WB in mouse.

Mouse monoclonal anti-  $\beta$ -3-Tubulin Thermo Fisher Sci Cat# 14-4510-80: manufacturer validation (<https://www.thermofisher.com/antibody/product/beta-3-Tubulin-Antibody-clone-2G10-TB3-Monoclonal/14-4510-82>).

Rabbit monoclonal anti- $\alpha$ -Tubulin acetylated (Lys40) Cell Signaling Cat# 5335: manufacturer validation (<https://www.cellsignal.com/products/primary-antibodies/acetyl-a-tubulin-lys40-d20g3-xp-rabbit-mab/5335>). Sheu, J. R., Hsieh, C. Y., et al. HDAC6 dysfunction contributes to impaired maturation of adult neurogenesis in vivo: vital role on functional recovery after ischemic stroke. *Journal of Biomedical Science* (2019). Tested by WB in mouse cells.

Mouse monoclonal anti- $\alpha$ -Tubulin tyrosinated Sigma-Aldrich Cat# T9028: manufacturer validation (<https://www.sigmaaldrich.com/catalog/product/sigma/t9028?lang=es&region=ES>). Cho Y., et al. Filamin A is required in injured axons for HDAC5 activity and axon regeneration. *J Biol Chem* (2015). Tested by WB in mouse cells.

Rabbit polyclonal anti- $\alpha$ -Tubulin detyrosinated Millipore Cat# AB3201: manufacturer validation ([https://www.merckmillipore.com/ES/es/product/Anti-Tubulin-Antibody-Detyrosinated,MM\\_NF-AB3201?ReferrerURL=https%3A%2F%2Fwww.google.com%2F](https://www.merckmillipore.com/ES/es/product/Anti-Tubulin-Antibody-Detyrosinated,MM_NF-AB3201?ReferrerURL=https%3A%2F%2Fwww.google.com%2F)). Herms, A., et al. AMPK activation promotes lipid droplet dispersion on detyrosinated microtubules to increase mitochondrial fatty acid oxidation. *Nat comm* (2015). Tested by IF. Schock, EN., et al. Using the avian mutant talpid2 as a disease model for understanding the oral-facial phenotypes of oral-facial-digital syndrome. *Disease models & mechanisms* (2015). Tested by WB in mouse.

Rabbit polyclonal anti- $\alpha$ -Tubulin  $\Delta$ 2 Synaptic Systems Cat# 302 213: manufacturer validation (<https://www.sysy.com/products/tubulin/facts-302213.php>).

Rabbit antiserum anti-Ubiquitin Sigma-Aldrich Cat# U5379: manufacturer validation (<https://www.sigmaaldrich.com/catalog/product/sigma/u5379?lang=es&region=ES>). Sewduth, RN., et al. The ubiquitin ligase PDZRN3 is required for vascular morphogenesis through Wnt/planar cell polarity signalling. *Nat Comm* (2014). Tested by WB in mouse samples. Ayaki T., et al. Immunoreactivity of valosin-containing protein in sporadic amyotrophic lateral sclerosis and in a case of its novel mutant. *Acta Neuropathol Commun.* (2014). Tested by IHC.

Mouse monoclonal anti-WIPI2 BioRad Cat# AB\_10845951: manufacturer validation (<https://www.bio-rad-antibodies.com/monoclonal/human-wipi2-antibody-2a2-mca5780.html?f=purified>). Hannah EJ., et al. Mammalian Atg18 (WIPI2) localizes to omegasome-anchored phagophores and positively regulates LC3 lipidation. *Autophagy* (2010). Tested by WB and ICC in mouse cells.

Goat anti-Mouse IgG (H+L) peroxidase-conjugated Jackson ImmunoResearch Cat# 115-035-003: manufacturer validation (<https://www.jacksonimmuno.com/catalog/products/115-035-003>). Du, X., Zhang, Z., Zheng, X. et al. An electrochemical biosensor for the detection of epithelial-mesenchymal transition. *Nat Commun* 11, 192 (2020).

Goat anti-Mouse IgG, light chain specific, peroxidase conjugated Jackson ImmunoResearch Cat# 115-035-174: manufacturer validation (<https://www.jacksonimmuno.com/catalog/products/115-035-174>). : Sutton, L.P., Muntean, B.S., Ostrovskaya, O., Zucca, S., Dao, M., Orlandi, C., et al. (2019) NF1-cAMP signaling dissociates cell type-specific contributions of striatal medium spiny neurons to reward valuation and motor control. *PLoS Biol* 17 (10): e3000477.

Goat anti-Rabbit IgG (H+L) peroxidase-conjugated Jackson ImmunoResearch Cat# 111-035-003: manufacturer validation (<https://www.jacksonimmuno.com/catalog/products/111-035-003>). Eisenberg-Lerner, A., Benyair, R., Hizkiahou, N., Nudel, N., Maor, R., Kramer, M. P., ... Merbl, Y. Golgi organization is regulated by proteasomal degradation. *Nat comm*, 11(1), 409. (2020)

Goat anti-Guinea Pig IgG (H+L) peroxidase-conjugated Jackson ImmunoResearch Cat# 106-035-003: manufacturer validation (<https://www.jacksonimmuno.com/catalog/products/106-035-003>). Saito, T., Kuma, A., Sugiura, Y. et al. Autophagy regulates lipid metabolism through selective turnover of NCoR1. *Nat Commun* 10, 1567 (2019)

Normal Rabbit IgG Cell Signaling Cat# 2729: manufacturer validation (<https://www.cellsignal.com/products/primary-antibodies/normal-rabbit-igg/2729>). Lückel, C., Picard, F., Raifer, H. et al. IL-17+ CD8+ T cell suppression by dimethyl fumarate associates with clinical response in multiple sclerosis. *Nat Commun* 10, 5722 (2019).

Normal Mouse IgG Millipore Cat# 12-371: manufacturer validation ([https://www.merckmillipore.com/ES/es/product/Normal-Mouse-IgG,MM\\_NF-12-371?ReferrerURL=https%3A%2F%2Fwww.google.com%2F](https://www.merckmillipore.com/ES/es/product/Normal-Mouse-IgG,MM_NF-12-371?ReferrerURL=https%3A%2F%2Fwww.google.com%2F)). amayo, A., Duong, H., Robles, M. et al. Histone monoubiquitination by Clock–Bmal1 complex marks Per1 and Per2 genes for circadian feedback. *Nat Struct Mol Biol* 22, 759–766 (2015).

Alexa Fluor 488 Goat anti-Mouse IgG Thermo Fisher Sci Cat# A-11029: manufacturer validation (<https://www.thermofisher.com/antibody/product/Goat-anti-Mouse-IgG-H-L-Highly-Cross-Adsorbed-Secondary-Antibody-Polyclonal/A-11029>). Shumilov, A., Tsai, M., Schlosser, Y. et al. Epstein–Barr virus particles induce centrosome amplification and chromosomal instability. *Nat Commun* 8, 14257 (2017).

Alexa Fluor 488 Goat anti-Rabbit IgG Thermo Fisher Sci Cat# A-11034: manufacturer validation (<https://www.thermofisher.com/antibody/product/Goat-anti-Rabbit-IgG-H-L-Highly-Cross-Adsorbed-Secondary-Antibody-Polyclonal/A-11034>). Lopez, J., Lim, R., Cruceanu, C. et al. miR-1202 is a primate-specific and brain-enriched microRNA involved in major depression and antidepressant treatment. *Nat Med* 20, 764–768 (2014).

Alexa Fluor 488 Goat anti-Chicken IgG Thermo Fisher Sci Cat# A-11039: manufacturer validation (<https://www.thermofisher.com/antibody/product/Goat-anti-Chicken-IgY-H-L-Secondary-Antibody-Polyclonal/A-11039>). Quadrato, G., Nguyen, T., Macosko, E. et al. Cell diversity and network dynamics in photosensitive human brain organoids. *Nature* 545, 48–53 (2017).

Alexa Fluor 568 Goat anti-Mouse IgG Thermo Fisher Sci Cat# A-11031: manufacturer validation (<https://www.thermofisher.com/antibody/product/Goat-anti-Mouse-IgG-H-L-Highly-Cross-Adsorbed-Secondary-Antibody-Polyclonal/A-11031>). van de Ven, R., de Groot, J., Park, D. et al. p120-catenin prevents multinucleation through control of MKLP1-dependent RhoA activity during cytokinesis. *Nat Commun* 7, 13874 (2016).

Alexa Fluor 568 Goat anti-Rabbit IgG Thermo Fisher Sci Cat# A-11036: manufacturer validation (<https://www.thermofisher.com/antibody/product/Goat-anti-Rabbit-IgG-H-L-Highly-Cross-Adsorbed-Secondary-Antibody-Polyclonal/A-11036>). Hoch, N., Hanzlikova, H., Rulten, S. et al. XRCC1 mutation is associated with PARP1 hyperactivation and cerebellar ataxia. *Nature* 541, 87–91 (2017).

Alexa Fluor 568 Donkey anti-Goat IgG Thermo Fisher Sci Cat# A-11057: manufacturer validation (<https://www.thermofisher.com/antibody/product/Donkey-anti-Goat-IgG-H-L-Cross-Adsorbed-Secondary-Antibody-Polyclonal/A-11057>). Eggenschwiler, R., Moslem, M., Fráguas, M. et al. Improved bi-allelic modification of a transcriptionally silent locus in patient-derived iPSC by Cas9 nickase. *Sci Rep* 6, 38198 (2016).

Alexa Fluor 647 Goat anti-Mouse IgG Thermo Fisher Sci Cat# A-21236: manufacturer validation (<https://www.thermofisher.com/antibody/product/Goat-anti-Mouse-IgG-H-L-Highly-Cross-Adsorbed-Secondary-Antibody-Polyclonal/A-21236>). Kim, S., Im, S., Oh, S. et al. Anisotropically organized three-dimensional culture platform for reconstruction of a hippocampal neural network. *Nat Commun* 8, 14346 (2017).

Alexa Fluor 647 Goat anti-Rabbit IgG Thermo Fisher Sci Cat# A-21245: manufacturer validation (<https://www.thermofisher.com/antibody/product/Goat-anti-Rabbit-IgG-H-L-Highly-Cross-Adsorbed-Secondary-Antibody-Polyclonal/A-21245>). Loo, L., Bougen-Zhukov, N. & Tan, W. Early spatiotemporal-specific changes in intermediate signals are predictive of cytotoxic sensitivity to TNF $\alpha$  and co-treatments. *Sci Rep* 7, 43541 (2017).

Alexa Fluor 647 Goat anti-Guinea Pig IgG Thermo Fisher Sci Cat# A-21450: manufacturer validation (<https://www.thermofisher.com/antibody/product/Goat-anti-Guinea-Pig-IgG-H-L-Highly-Cross-Adsorbed-Secondary-Antibody-Polyclonal/A-21450>). Bramini, M., Sacchetti, S., Armirotti, A., et al. Graphene Oxide Nanosheets Disrupt Lipid Composition, Ca<sup>2+</sup> Homeostasis, and Synaptic Transmission in Primary Cortical Neurons. *ACS Nano* 10 (7), 7154–7171 (2016).

Alexa Fluor 647 Goat anti-Rat IgG Thermo Fisher Sci Cat# A-21247: manufacturer validation (<https://www.thermofisher.com/antibody/product/Goat-anti-Rat-IgG-H-L-Cross-Adsorbed-Secondary-Antibody-Polyclonal/A-21247>). Quadrato, G., Nguyen, T., Macosko, E. et al. Cell diversity and network dynamics in photosensitive human brain organoids. *Nature* 545, 48–53 (2017)

Abberior STAR 635P Goat anti-mouse IgG Abberior Cat#ST635P: manufacturer validation (<https://www.abberior.com/jtl-shop/Abberior-STAR-635P>). Mazkereth, N., Rocca, F., Schubert, J.R., et al. *Immunobiology* 221 (12), 1395–1406 (2016).

## Eukaryotic cell lines

Policy information about [cell lines](#)

|                                                                      |                                                                                                                                                                                                                                                                                 |
|----------------------------------------------------------------------|---------------------------------------------------------------------------------------------------------------------------------------------------------------------------------------------------------------------------------------------------------------------------------|
| Cell line source(s)                                                  | HEK293T were obtained from Prof. M. Lammers (CECAD, Cologne) and were originally from ATCC, NSC34 cells (CLU140, Cedarlane) were obtained from Prof. B. Wirth (University Hospital, Cologne), MEF cells were obtained from Prof. T. Langer (MPI for Biology of Ageing, Cologne) |
| Authentication                                                       | Cell lines were authenticated by morphology                                                                                                                                                                                                                                     |
| Mycoplasma contamination                                             | Cell lines were not tested for mycoplasma contamination                                                                                                                                                                                                                         |
| Commonly misidentified lines<br>(See <a href="#">ICLAC</a> register) | No commonly misidentified cell lines were used in the study.                                                                                                                                                                                                                    |

## Animals and other organisms

Policy information about [studies involving animals](#); [ARRIVE guidelines](#) recommended for reporting animal research

|                         |                                                                                                                                                                                                                 |
|-------------------------|-----------------------------------------------------------------------------------------------------------------------------------------------------------------------------------------------------------------|
| Laboratory animals      | Mus Musculus, C57Bl/6, both sexes, postnatal days P0-P5, 12-13 weeks old                                                                                                                                        |
| Wild animals            | This study did not involve wild animals                                                                                                                                                                         |
| Field-collected samples | This study did not involve samples collected from the field                                                                                                                                                     |
| Ethics oversight        | All animal experiments were reviewed and approved by the ethics committee of the "Landesamt für Natur, Umwelt- und Verbraucherschutz des Landes Nordrhein-Westfalen", Cologne (2015.A578, 2016.A041, 2016.A451) |

Note that full information on the approval of the study protocol must also be provided in the manuscript.
